1 **Title**

2 ***Bifidobacterium breve* UCC2003 induces a distinct global transcriptomic programme in**  
3 **neonatal murine intestinal epithelial cells**

4

5 **Authors**

6 Raymond Kiu<sup>1</sup>, Agatha Treveil<sup>1,2</sup>, Lukas C. Harnisch<sup>1</sup>, Shabhonam Caim<sup>1</sup>, Charlotte  
7 Leclaire<sup>1</sup>, Douwe van Sinderen<sup>3</sup>, Tamas Korcsmaros<sup>1,2</sup>, Lindsay J. Hall<sup>1,4\*#</sup>

8 **Affiliations**

9 <sup>1</sup> Gut Microbes & Health, Quadram Institute Bioscience, Norwich Research Park, Norwich,  
10 UK

11 <sup>2</sup> Earlham Institute, Norwich Research Park, Norwich, UK

12 <sup>3</sup>APC Microbiome Ireland & School of Microbiology, University College Cork, Cork, Ireland

13 <sup>4</sup>Norwich Medical School, University of East Anglia, Norwich Research Park, Norwich, UK

14 **Author List Footnotes**

15 # Lead contact

16 **Contact Info**

17 \* Correspondence: Email: [Lindsay.Hall@quadram.ac.uk](mailto:Lindsay.Hall@quadram.ac.uk)

18

19

20

21

22

23

24

## 25 **Summary**

26 *Bifidobacterium* is an important gut microbiota member during early life that is associated  
27 with improved gut health. However, the underlying health-driving mechanisms are not well  
28 understood, particularly how *Bifidobacterium* may modulate the intestinal barrier via  
29 programming of intestinal epithelial cells (IECs). In this study, we sought to investigate the  
30 global impact of model strain *Bifidobacterium breve* UCC2003 on the neonatal IEC  
31 transcriptome, including gene regulation and pathway modulation. Small IECs from two-  
32 week-old neonatal mice administered *B. breve* UCC2003 for three consecutive days or PBS  
33 (control group) were subjected to global RNASeq, with various bioinformatic approaches  
34 used to determine differentially expressed genes, pathways and affected cell types between  
35 control and experimental groups. Whilst colonisation with *B. breve* had minimal impacts on  
36 the neonatal microbiota, we observed extensive regulation of the IEC transcriptome; ~4,000  
37 genes significantly up-regulated, including key genes associated with epithelial barrier  
38 function. Enrichment of cell differentiation and cell proliferation pathways were observed,  
39 along with an overrepresentation of stem cell marker genes, indicating an increase in the  
40 regenerative potential of the epithelial layer. Expression of distinct immune-associated  
41 pathway members (e.g. Toll-like Receptors) were also affected after neonatal *B. breve*  
42 colonisation. In conclusion, *B. breve* UCC2003 plays a central role in driving universal  
43 transcriptomic changes in neonatal IECs that enhances cell replication, differentiation and  
44 growth, predominantly in the stem cell compartment. This study enhances our overall  
45 understanding of the benefits of *B. breve* in driving intestinal epithelium homeostatic  
46 development during early life, with potential avenues to develop novel live biotherapeutic  
47 products.

48

49 **Key words:** RNA-Seq, *in vivo*, *Bifidobacterium breve*, intestinal epithelial cells, gene  
50 expression, neonatal

51

## 52 **Introduction**

53 *Bifidobacterium* represents a keystone member of the early life gut microbiota [1-3]. Certain  
54 species and strains are found at high levels in vaginally delivered breast-fed infants including;  
55 *Bifidobacterium longum* subsp. *infantis*, *B. longum* subsp. *longum*, *B. bifidum*, *B.*

56 *pseudocatenulatum* and *B. breve* [4-7]. As a dominant member of the neonatal gut  
57 microbiota, *Bifidobacterium* is associated with metabolism of breast milk, modulation of host  
58 immune responses, and protection against infectious diseases [8-11]. However, the  
59 mechanisms driving improved health outcomes during early life are largely underexplored.

60 A key interface between *Bifidobacterium* and the host is the intestinal epithelial cell (IEC)  
61 barrier [12, 13]. Previous studies have indicated that certain strains of *Bifidobacterium*  
62 specifically modulate IEC responses during inflammatory insults, which may help protect  
63 from certain gut disorders [14-16]. In murine experimental models, previous work by our  
64 group has shown that infant-associated *B. breve* UCC2003 modulates cell death-related  
65 signalling molecules, which in turn reduces the number of apoptotic IECs [17]. This  
66 protection from pathological IEC shedding appeared to be via the *B. breve* exopolysaccharide  
67 (EPS) capsule and the host-immune adaptor protein MyD88. Another strain of *B. breve*,  
68 NumRes 204 (commercial strain) has also been shown to up-regulate the tight junction  
69 proteins Claudin 4 and Occludin in a mouse colitis model [18, 19].

70 Many of the studies to date have focused on the role of *Bifidobacterium* and modulation of  
71 IECs in the context of acute or chronic gut inflammation, with expression profiling limited to  
72 specific immune or apoptosis signalling targets [14, 20-22]. As many of these studies have  
73 involved pre-colonisation of the gut with *Bifidobacterium* strains, followed by inflammatory  
74 insult, this suggests that initial priming during normal 'healthy' conditions may modulate  
75 subsequent protective responses. Furthermore, these studies have often been performed in  
76 adult mice rather than exploring effects during the early life developmental window, where  
77 *Bifidobacterium* effects are expected to be most pronounced. Previous work has indicated  
78 that there is significant modulation of the neonatal IEC transcriptome in response to gut  
79 microbiota colonisation, but to date no studies have probed how particular early life  
80 associated microbiota members, like *Bifidobacterium* may modulate neonatal IEC responses  
81 [23]. Thus, to understand if and how *Bifidobacterium* may modulate IEC homeostasis during  
82 the early life developmental window, we colonised neonatal mice with *B. breve* UCC2003  
83 and profiled transcriptional responses in isolated small intestine IECs using global RNA-Seq.  
84 Our analysis indicated whole-scale changes in the transcriptional programme of IECs (~4,000  
85 significantly up-regulated genes) that appear to be linked to cell differentiation/proliferation  
86 and immune development. Notably the stem cell compartment of IECs seemed to elicit the  
87 strongest gene signature. These data highlight the role of the early life microbiota member *B.*  
88 *breve* UCC2003 in driving early life epithelial cell differentiation and maturation; impacting

89 intestinal integrity and immune functions, which provides a mechanistic basis for  
90 understanding associated health-promoting effects.

## 91 **Results**

92 To examine the effects of *B. breve* UCC2003 on the transcriptional profiles of host IECs  
93 under homeostatic conditions, we extracted RNA from isolated IECs of healthy two-week old  
94 neonatal mice (control group) and mice gavaged with *B. breve* UCC2003 for three  
95 consecutive days ( $n=5$  per group). Isolated RNAs from IECs were subjected to RNA-Seq to  
96 determine global mRNA expression (Fig. 1). Subsequently, Differential Gene Expression  
97 (DGE) analysis was performed to understand *B. breve*-associated gene regulation

### 98 **Colonisation of *B. breve* UCC2003 and impact on the wider neonatal microbiota**

99 Initially, we confirmed gut colonisation of *B. breve* UCC2003 and impact on the wider  
100 microbiota using culture and 16S rRNA microbiota profiling approaches (Fig. 2a-b). We  
101 observed high levels of *B. breve* UCC2003 across the four days in faecal samples, with  
102 higher levels of *B. breve* UCC2003 within the colon ( $\sim 10^8$  CFU/g), when compared to the  
103 small intestine ( $\sim 10^5$  CFU/g; Fig. 2b). Based on 16S rRNA analysis, relative abundance of  
104 *Bifidobacterium* increased significantly in the UCC2003 group ( $P=0.012$ ) following bacterial  
105 administration, while the control group displayed very low relative *Bifidobacterium*  
106 abundance ( $\sim 0.01\%$ ; Fig. 2c). Principal component analysis (PCA) on gut microbiota profiles  
107 (control vs UCC2003) showed a distinct change in microbial community composition in the  
108 UCC2003 group; primarily driven by *Bifidobacterium*, and to a lesser extent by *Lactobacillus*  
109 and *Bacteroides* (Fig. 2d). Supplementation of *B. breve* also significantly increased the  
110 overall microbial diversity in the UCC2003 group (Fig. 2e). Further Linear Discriminant  
111 Analysis (LDA) demonstrated that although *Bifidobacterium* was enriched in UCC2003  
112 group, colonisation had minimal impact on overall microbiota profiles, although very low  
113 relative abundance ( $<2\%$ ) microbiota members *Streptococcus*, *Ruminococcus*, *Prevotella*,  
114 *Coprococcus* were significantly reduced in the *B. breve* UCC2003 group (Fig. 2f-g).

### 115 **Impact of *B. breve* UCC2003 on the neonatal intestinal epithelial transcriptome**

116 To understand the distribution of samples based on IEC gene expression profiles we  
117 performed PCA analysis (Fig. 3a; Table S1). All samples clustered according to group  
118 (control vs UCC2003), suggesting a significant impact of *B. breve* UCC2003 on gene  
119 expression profiles, with distance-wise clustering (Jensen-Shannon) also supporting  
120 separation of experimental groups (Fig. 3b). To define Differentially Expressed Genes

121 (DEG), we employed a filter of absolute  $\log_2(\text{fold change}) > 1.0$  (with adjusted  $P < 0.05$ ),  
122 which equates to a minimum two-fold change in gene expression (Fig. 3c-e; Table S2). After  
123 analysis, a total of 3,996 DEGs were significantly up-regulated, while 465 genes were  
124 significantly down-regulated in *B. breve* UCC2003 supplemented animals when compared to  
125 controls (Fig. 3c and 4a). Notably, we also performed the same experimental protocol on  
126 healthy mice aged 10-12 weeks, and we did not observe any DEGs, suggesting *B. breve*  
127 UCC2003 modulation of IECs is strongest within the early life window under homeostatic  
128 conditions.

129 To determine the functional role of the DEGs, we examined the most significantly regulated  
130 genes ranked by False Discovery Rate (FDR) adjusted  $p$  values (or,  $q$  values). We first looked  
131 at the top 20 up-regulated DEGs in the *B. breve* UCC2003 experimental group (Fig. 4b).  
132 Most genes annotated with known biological processes were cell differentiation and cell  
133 component organisation functions including *Ccnblip1*, *Hist1h4b*, *Vps13b* and *Fgd4*  
134 (annotated in the PANTHER Gene Ontology [GO] Slim resource). Two genes were involved  
135 in cell death and immune system processes, namely *Naip6* and *Gm20594* (Table S3). When  
136 we ranked the top-regulated genes using  $\log_2$ -fold change, we observed increased expression  
137 of *Creb5*, which is involved in the regulation of neuropeptide transcription (cAMP response  
138 element binding protein; CREB) (Fig. 4c). CREB is also known to regulate circadian rhythm,  
139 and we also identified additional circadian-clock-related genes that were significantly up-  
140 regulated including *Per2* and *Per3*. We noted that several top down-regulated DEGs were  
141 annotated as genes involved in metal binding, or metal-related genes including *Mt1*, *Mt2*,  
142 *Hba-a1*, *Hbb-bt* and *Ftl1-ps1* (Fig. 4d; Table S4). These data suggest indicates *B. breve*  
143 stimulates specific genes involved in important physiological processes highlighting the  
144 importance of this microbiota member during the early life developmental window.

#### 145 ***B. breve* UCC2003 modulation of intestinal epithelial barrier-associated genes**

146 As *B. breve* strains have been previously shown to modulate certain tight junction/barrier-  
147 related proteins, we next investigated DEGs associated with intestinal epithelial barrier  
148 development/intestinal structural organisation (Fig. 4e). Several tight-junction (TJ) structural-  
149 associated DEGs were observed, including Claudin-encoding gene *Cldn34c1* (Log<sub>2</sub> fold-  
150 change [LFC] 3.14), Junction Adhesion Molecules-encoding genes *Jam2* (LFC 2.9), and  
151 Tight Junction protein (also called Zonula Occludens protein; ZO) -encoding gene *Tjp1* (LFC  
152 1.49). Other important TJ-associated protein-encoding genes including *Ocln* (encodes  
153 Occludin), and *Tjp2* and *Tjp3* and *Cldn12* (which represent ZO encoding genes) appeared to

154 be transcriptionally up-regulated, although they did not pass the significant foldchange  
155 threshold. Genes that encode integrins (involved in regulation of intracellular cytoskeleton)  
156 also exhibited a trend of increased expression (13/14; 92.8%). Both Piezo genes, which assist  
157 in tight junction organisation, *Piezo1* (LFC 1.25) and *Piezo2* (LFC 1.9), were significantly  
158 up-regulated in the *B. breve* UCC2003 treated group.

159 Over 90% of cadherins, proteins associated with the assembly of adherens junctions (Fig. 4e)  
160 were up-regulated; including *Pcdhb14* (LFC 2.8), *Pcdhgb4* (LFC 2.7), *Pcdh8* (LFC 1.3), *Fat1*  
161 (LFC 1.5) and *Dsg2* (LFC 1.1). Interestingly, several genes (4/7; 57.1%) involved in mucus  
162 layer generation were significantly up-regulated in the UCC2003 experimental group  
163 including *Muc2* (LFC 2.2), *Muc6* (LFC 3.7), *Muc5b* (LFC 2.9), and *Muc4* (LFC 1.24). Genes  
164 *Gjal* (LFC 3.59) and *Gjb8* (LFC 2.63) that encode gap junction proteins were also up-  
165 regulated. In addition, we also investigated differential expression of genes associated with  
166 integrin assembly and downstream integrin signalling pathways (Fig. 4f). Over 70% (16/21)  
167 of these genes were up-regulated, with 52.3% (11/21) significantly increased in gene  
168 expression in the UCC2003 group (LFC >1.0).

169 We observed increased expression of genes associated with IEC barrier development  
170 including cadherins, gap junctions, integrins, mucus layer-associated genes, and several key  
171 tight junction proteins. These strongly induced gene expression profiles suggest that *B. breve*  
172 UCC2003 is involved in enhancing epithelial barrier development in neonates.

### 173 ***B. breve* UCC2003 modulates cell maturation processes**

174 We next sought to understand the biological functions of up-regulated DEGs by employing  
175 PANTHER GO-Slim functional assignment, and process/pathway enrichment analysis (Fig.  
176 S1; Table S5-S9). DEGs were predominantly involved in general biological processes  
177 including cellular process (901 genes) and metabolic process (597 genes; Table S5). At the  
178 molecular function level, DEGs were primarily assigned to binding (868 genes) and catalytic  
179 activity (671 genes; Table S6), with Olfactory Signalling Pathway and Cell Cycle (biological)  
180 pathways also found to be enriched (Table S7).

181 To delve further into the data, we constructed a signaling network based on up-regulated  
182 DEGs (n=3,996) with the aim of identifying specific gene networks involved in important  
183 signalling pathways (Fig. 5a). Overall, 1,491 DEGs were successfully mapped (37.3%) to a  
184 signalling network that comprised 8,180 genes. Four individual clusters of genes were  
185 detected, with functional assignment and pathway analysis implemented on these clusters

186 (Fig. 5a). All gene clusters were associated with cell differentiation and maturation, with  
187 cluster 1 (68 genes) linked specifically with DNA replication and transcription, cluster 2 (26  
188 genes) with cell growth and immunity, cluster 3 (11 genes) with cell replication, and cluster 4  
189 (72 genes) related to cell cycle and cell division (Table S10).

### 190 **Intestinal cell type analysis on DEGs identifies significant enrichment of epithelial stem** 191 **cells**

192 IECs include several absorptive and secretory cell types, namely enterocytes, Paneth cells,  
193 goblet cells, enteroendocrine cells, tuft cells and stem cells. As these cells perform different  
194 functions in the gut, it was important to understand whether *B. breve* UCC2003 had a cell  
195 type specific effect on the intestinal epithelium. Using known cell type specific gene markers  
196 [24], we identified cell type gene signatures modulated within the UCC2003 group (Fig. 5b-  
197 c). Importantly, all cell type markers were well represented in the expressed genes of the  
198 whole IEC transcriptomics data from both groups (control + UCC2003), thus validating the  
199 presence of all IEC types in our study data (Fig. 5b). Cell type analysis of genes differentially  
200 expressed after *B. breve* UCC2003 supplementation, revealed that stem cell marker genes  
201 were significantly enriched (30%;  $P < 0.05$ ) among the six IEC types (Table S11). Signatures  
202 of other cell types were also present (linking to marker genes in the DEG list) but not  
203 significantly overrepresented: Tuft cells (22%), enteroendocrine cells (18%), goblet cells  
204 (15%), Paneth cells (15%) and enterocytes (13%; Fig. 5c). These data indicated that intestinal  
205 epithelial stem cells, cells primarily involved in cell differentiation, were the primary cell  
206 type whose numbers and transcriptomic programme were regulated by *B. breve* UCC2003.

207 Further investigation of this stem cell signature revealed that of the 37 differentially  
208 expressed marker genes, 35 are up-regulated in the presence of *B. breve* UCC2003. This  
209 indicates an increase in the quantity of stem cells or semi-differentiated cells in the  
210 epithelium, consistent with the overrepresentation of cell cycle and DNA replication  
211 associated genes observed in the whole differential expression dataset. Functional analysis of  
212 the 37 stem cell signature genes revealed only one overrepresented process – Regulation of  
213 Frizzled by ubiquitination ( $P < 0.05$ ), which is a subprocess of WNT signalling. WNT  
214 signalling is important in maintaining the undifferentiated state of stem cells [25].

215 Finally, we employed a network approach to predict key transcription factor (TF) regulators  
216 of the differentially expressed stem cell marker genes, through which *B. breve* UCC2003 may  
217 be acting (Fig. 5d). Using the TF-target gene database, DoRothEA, we identified expressed

218 TFs known to regulate these genes [26, 27]. Five genes had no known and expressed  
219 regulator, thus were excluded. Hypergeometric significance testing was used to identify  
220 which of these TFs are the most influential (see Methods for details). This analysis identified  
221 32 TF regulators (Fig. 5d). Of these regulators, 12 were differentially expressed in the IEC  
222 dataset (all up-regulated): *Fos*, *Gabpa*, *Rcor1*, *Arid2*, *Tead1*, *Mybl2*, *Mef2a*, *Ahr*, *Pgr*, *Kmt2a*,  
223 *Ncoa2* and *Tcf12*. Functional analysis of all the TF regulators and their targeted genes  
224 together, revealed overrepresented functions relating to WNT signalling, histone methylation  
225 for self-renewal and proliferation of hematopoietic stem cells and nuclear receptor (incl.  
226 estrogen) signalling (Table S12). These data provide evidence that *B. breve* UCC2003  
227 directly affects key transcriptomic programmes regulating drives specific signalling  
228 processes, particularly within stem cells.

## 229 **Discussion**

230 The early life developmental window represents a crucial time for microbe-host interactions  
231 that impacts health both in the short- and longer-term. Understanding how specific  
232 microbiota members modulate host responses during these life stages is crucial if we are to  
233 develop next-stage targeted microbiota therapies. Here we investigated how *B. breve*  
234 UCC2003 induces genome-wide transcriptomic changes in small intestine IECs of neonatal  
235 mice. We observed that *B. breve* had a global impact on the IEC transcriptome, evidenced by  
236 the large number of significantly up-regulated genes and pathways related to cell  
237 differentiation and cell proliferation, including genes associated with epithelial barrier  
238 function. We propose that *B. breve* is a key early life microbiota member driving fundamental  
239 cellular responses in IECs, particularly within the stem cell compartment, and thus drives  
240 epithelial barrier development and maintenance during neonatal life stages.

241 *B. breve* UCC2003 is a model strain that was previously isolated from the stool of a breast-  
242 fed infant [28, 29]. Although human-associated, numerous previous studies have shown this  
243 strain can efficiently colonise (long-term) the mouse gastrointestinal tract, which we also  
244 observed in this study [30, 31]. Importantly, although at lower levels ( $\sim 10^5$  CFU/g), we  
245 observed *B. breve* UCC2003 within the small intestine, linking to our subsequent  
246 observations of significant impacts on the IEC transcriptome from this intestinal region.  
247 Furthermore, our microbiota profiling suggests minimal impacts on the wider microbiota (at  
248 genus level) after supplementation, suggesting that *B. breve* UCC2003 is principally driving



249 specific transcriptomic outcomes. However, we cannot discount that *B. breve* is driving more  
250 nuanced microbiota changes, which may also be contributing to downstream IEC responses.

251 *B. breve* is known to confer beneficial effect on gut health, however our knowledge related to  
252 the mechanisms underlying these responses are limited. Most studies have focused on  
253 targeted immune cells or pathways (during disease and/or inflammation), and to our  
254 knowledge no studies have probed global transcriptomic changes within IECs - the frontline  
255 physical barrier between bacteria and host [32, 33]. Our presented findings: ~4,000 up-  
256 regulated DEGs and ~450 down-regulated DEGs within the *B. breve* group indicate that this  
257 *Bifidobacterium* strain modulates whole-scale changes within this critical single cell layer.  
258 Notably, we also examined how *B. breve* modulates adult IEC responses, however, we did  
259 not observe any significantly differentially regulated genes when compared to control  
260 animals. The striking differences in DEGs between these two life points indicates that *B.*  
261 *breve*-modulation of IECs is limited to the neonatal window. Dominance of *Bifidobacterium*  
262 in early life (including strains of *B. breve*) overlaps with the development and maturation of  
263 many host responses, including epithelial barrier integrity. Therefore, presence of these  
264 strains would be expected to play an over-sized role in this initial homeostatic priming, that  
265 may afford protection against inflammatory insults in later-life, as has been shown previously  
266 in a mouse model of pathological epithelial cell shedding [17].

267 Exploring the transcriptional responses in more detail revealed that expressions of key genes  
268 associated with formation of epithelial barrier components were up-regulated, including  
269 major cell junction protein encoding genes (75%; 42/56 genes). More specifically, several  
270 integrin-associated genes were up-regulated in the presence of UCC2003. Integrins facilitates  
271 cell-cell and cell-extracellular matrix ECM adhesion and binding, and assembly of the  
272 fibronectin matrix that is pivotal for cell migration and cell differentiation [34-36]. Integrins  
273 also play an important role in downstream intracellular signalling that controls cell  
274 differentiation, proliferation and cell survival, including the Raf-MEK-ERK signalling  
275 pathway (we also observed enrichment of genes involved in this pathway) [37, 38]. Another  
276 key intestinal barrier component is represented by tight junctions; linking complexes between  
277 intercellular spaces, and comprise transmembrane proteins including occludins, claudins,  
278 zona occludens and junctional adhesion molecules [13, 39]. Dysfunctional tight junctions  
279 may lead to a 'leaky' gut, which is characteristic of numerous intestinal disorders including  
280 inflammatory bowel diseases [40]. Notably, previous work has suggested early life  
281 microbiota disruptions (via antibiotic usage) and reductions in *Bifidobacterium* are correlated

282 with increased risk and/or symptoms of ulcerative colitis and Crohn's disease [41-45]. A  
283 wide range of TJ-related genes were up-regulated after UCC2003 supplementation,  
284 particularly *Tjp1* (that encodes ZO-1), *Jam2* and *Claudin34c1*, with a previous study  
285 indicating other *Bifidobacterium* species (i.e. *B. bifidum*) also modulate TJ expression via  
286 ZO-1 [46]. These data indicated that specific strains of *Bifidobacterium* may modulate key  
287 barrier integrity systems during the neonatal period, and therefore absence of this key initial  
288 bacterial-host crosstalk may correlate with increased risk of chronic intestinal disorders in  
289 later-life [44]. Intestinal mucus, encoded by *Muc* genes (up-regulated due to *B. breve*  
290 UCC2003 in this study), plays a crucial role in colonic protection via formation of a physical  
291 barrier between the gut lumen and IECs, and deficiencies in MUC-2 has been linked with  
292 experimental colitis and increased inflammation in IBD patients [47, 48]. We have also  
293 observed that *B. breve* UCC2003 significantly increases goblet cell numbers and mucus  
294 production (in gnotobiotic and SPF mice; data not shown). Although the mucus layer may  
295 impact direct *Bifidobacterium*-IEC interactions, previous studies have indicated that *B. breve*  
296 UCC2003 surface molecules, such as EPS and the Tad pilus may modulate IEC function via  
297 signaling through TLRs [17, 49]. Moreover, bifidobacterial metabolites, such as short-chain  
298 fatty acids may also act to modulate the IEC transcriptome, with previous studies indicating  
299 enhanced expression of TJs and cadherins via acetate [9, 14, 50, 51].

300 Further network and functional analysis indicated clusters of up-regulated DEGs were  
301 associated with cell maturation and cell differentiation (as confirmed by cell type specific  
302 analysis), suggesting neonatal *B. breve* exposure positively modulates IEC cell  
303 differentiation, growth and maturation. Somewhat surprisingly, we did not observe the same  
304 type of striking responses in immune pathways, which may be masked by the sheer number  
305 of DEGs involved in cellular differentiation and processes. However, pathways such as Toll-  
306 like Receptor TLR1 or TLR2 pathways do appear to be enriched (cluster 2 of signalling  
307 network analysis). This may link to previous work indicating that the UCC2003 EPS directly  
308 signals via TLR2 to induce MyD88 signalling cascades to protect IECs during intestinal  
309 inflammation [17]. *B. breve* M-16V was also shown to interact with TLR2 to up-regulate  
310 ubiquitin-editing enzyme A20 expression that correlated with increased tolerance to a TLR4  
311 cascade in porcine IECs, further supporting the involvement of *B. breve* in programming key  
312 host immunoregulation receptors [52].

313 Cell type specific analysis of DEGs revealed stem cells as the IEC type most affected by *B.*  
314 *breve*, with absorptive enterocytes least affected despite being most accessible to bacteria in

315 the gut. This implies that *B. breve* or their secreted metabolites can reach the crypts of the  
316 small intestinal epithelium. This has been previously suggested by *in situ* hybridisation  
317 histology *in vivo* and by *Bifidobacterium*-conditioned media altering the expression of  
318 hundreds of host epithelial genes linked to immune response, cell adhesion, cell cycle and  
319 development in IECs *in vitro* [17, 53]. All but two of the 37 differentially expressed stem  
320 cell marker genes were up-regulated in the presence of *B. breve* UCC2003, indicating an  
321 activating effect resulting in increased pluripotency of stem cells, increased quantity of stem  
322 cells and/or an increased quantity of semi-differentiated cells. Single cell sequencing of IECs  
323 could be used to further investigate this finding. Thirty-two TFs were predicted to regulate  
324 these stem cell signature genes, providing possible targets for future investigation of the  
325 mechanisms underlying these responses. Functional analysis of the stem cell signature genes  
326 and their regulators suggests *B. breve* increases pluripotency of stem cells and/or semi-  
327 differentiated epithelial cells through WNT signalling and nuclear hormone signalling [54].  
328 Furthermore, the overrepresentation of the process “RUNX1 regulates transcription of genes  
329 involved in differentiation of HSCs” indicates a possible role for histone methylation in  
330 response to *B. breve* UCC2003 [55]. Further determination of host metabolome and proteome  
331 after *B. breve* exposure may allow identification of the specific underlying molecular  
332 mechanisms [53].

333 In conclusion, *B. breve* UCC2003 plays a central role in orchestrating global neonatal IEC  
334 gene responses in a distinct manner; modulating genes involved in epithelial barrier  
335 development, and driving universal transcriptomic alteration that facilitates cell replication,  
336 differentiation and growth, particularly within the stem cell compartment. This study  
337 enhances our overall understanding of the benefits of specific early life microbiota members  
338 in intestinal epithelium development, with potential avenues to explore for subsequent  
339 development of novel live biotherapeutic products. Further work exploring time-dependent  
340 transcriptional responses, impact of other *Bifidobacterium* species and strains (and use of  
341 mutant strains), in tandem with metabolomic and proteomic approaches are required to fully  
342 understand the key host pathways and bifidobacterial molecules governing development and  
343 maturation of the intestinal barrier during early life.

344  
345

## 346 **Methods**

### 347 **Animals**

348 All animal experiments and related protocols were performed in accordance with the Animals  
349 (Scientific Procedures) Act 1986 (ASPA) under project licence (PPL: 80/2545) and personal  
350 licence (PIL: I68D4DCCF), approved by UK Home Office and University of East Anglia  
351 (UEA) FMH Research Ethics Committee. C57BL6/J neonatal female mice (n=10) were  
352 housed within UEA Disease Modelling Unit and fed autoclaved chow diet ad libitum. Mice  
353 were euthanised via ASPA Schedule 1 protocol (CO<sub>2</sub> and cervical dislocation).

### 354 **Bacterial culturing, inoculum preparation and CFU enumeration**

355 *B. breve* UCC2003 (also known as NCIMB 8807) was streaked from frozen glycerol stocks  
356 onto autoclaved Reinforced Clostridial Agar (RCA) plates (Oxoid, UK) and incubated in an  
357 anaerobic chamber (miniMACS, Don Whitley Scientific) at 37°C for 48 h prior to picking  
358 single colonies for inoculation in prewarmed sterilised Reinforced Clostridial Medium  
359 (Oxoid, UK).

360 For preparation of gavage inoculums, 5 ml of inoculated broth was incubated overnight  
361 followed by sub-culturing into 5 ml De Man, Rogosa and Sharpe (MRS) medium (Oxoid).  
362 After an additional overnight incubation, another sub-culturing into 40 ml RCM was  
363 performed. Inoculums were prepared from cultures by 3 rounds of centrifugation at 3220 g  
364 for 10 min followed by three PBS washes before dilution in 4 ml (adult mice) or 2 ml  
365 (neonatal mice) sterile PBS. Bacterial concentration of inoculum was enumerated by plating  
366 serial dilutions in sterile PBS on RCA plates and enumerating colonies following two-day  
367 incubation to calculate CFU/ml.

### 368 **Bacterial treatment and gut colonisation**

369 Neonatal mice were colonised with *B. breve* UCC2003 by oral gavage with bacterial  
370 inoculations of 10<sup>8</sup> CFU/ml in 50 µl every 24 h for 3 consecutive days. Control mice  
371 received oral gavages of sterile PBS. *B. breve* UCC2003 colonisation was confirmed by  
372 collection of fresh faeces or intestinal content homogenised with 1 ml sterile PBS followed  
373 by serial-dilution plating in sterile PBS on RCA supplemented with 50 mg/L mupirocin and  
374 counting of colonies following 2-day incubation to calculate CFU/mg.

### 375 **Gut microbiota profiling by 16S rRNA amplicon sequencing and analysis**

376 Genomic DNA extraction of mouse caecal samples on day 4 was performed with FastDNA  
377 Spin Kit for Soil following manufacturer's instructions and extending the bead-beating step  
378 to 3 min as described previously [56]. Extracted DNA was quantified, normalised and  
379 sequenced on Illumina MiSeq platform using a read length of  $2 \times 300$  bp, sequencing reads  
380 were analysed using OTU clustering methods (QIIME v1.9.1) to assign bacterial taxonomy  
381 and visualised as described previously [57, 58]. PCA was performed via R package *ggfotify*  
382 function *autoplot* and *prcomp*, while diversity index was computed via package *vegan* [59-  
383 61]. LDA was performed via LEfSe on Galaxy platform using default parameters [62]. All  
384 related graphs were otherwise plotted using R package *ggplot2* [63].

### 385 **Tissue collection and isolation of small intestinal epithelial cells (IECs)**

386 Upon tissue harvesting, 0.5 cm sections of small intestines were collected and incubated in  
387 200  $\mu$ l RNAlater™ (Thermo Fisher Scientific) at 4°C for 24 h. Samples were removed from  
388 RNAlater™ following incubation, blotted dry on filter paper and stored at -80°C until further  
389 analysis. An adapted Weisser method was applied for isolation of IECs [17]. Sections (10cm)  
390 of small intestines were collected in ice-cold PBS, dissected into 0.5 cm<sup>2</sup> pieces and placed  
391 in 200 ml Duran bottles. Faecal matter was washed off by inverting 10 times in 0.154M NaCl  
392 and 1mM DTT. Liquid was drained and mucus layer removed through incubation of samples  
393 in 1.5mM KCl, 96mM NaCl, 27 mM Tri-sodium citrate, 8mM NaH<sub>2</sub>PO<sub>4</sub> and 5.6mM  
394 Na<sub>2</sub>HPO<sub>4</sub> for 15 min at 220 rpm and 37 °C. IECs were separated from basal membrane by  
395 incubation in 1.5 mM EDTA and 0.5 mM DTT for 15 min at 200 rpm and 37 °C followed by  
396 shaking vigorously 20 times. IECs were collected from solution by centrifugation at 500 g for  
397 10 min at 4 °C. Supernatant was then discarded and cell pellet resuspended in 3 ml of ice-cold  
398 PBS. Cell concentrations of isolated IEC samples calculated by labelling dead cell with  
399 trypan blue at a 1:1 v/v ratio and enumeration of viable cells using a Neubauer  
400 haemocytometer on an inverted microscope (ID03, Zeiss).

### 401 **RNA extraction and sequencing**

402 RNA was extracted from IEC isolations by adding a volume containing  $2 \times 10^6$  cells in PBS  
403 to QIAshredder spin columns (QIAGEN) followed by centrifugation at 9,300 g for 1 min.  
404 Follow-through was mixed with 600  $\mu$ l RLT lysis buffer and used for subsequent RNA  
405 isolation. Homogenised sample in RLT buffer from both tissue and IEC isolations were  
406 processed by adding 700  $\mu$ l of 70% ethanol and mixing by pipetting. Sample was then added  
407 into RNeasy spin column and spun at 8,000 g for 15 sec. Flow through was discarded and

408 process repeated until all of sample was filtered through column. Then 700 µl of buffer RW1  
409 was added to column and centrifuge at 8,000 g for 30 s. Again, flow through was discarded  
410 and filter placed in a new collection tube. To the filter, 500 µl RPE was added and spun at  
411 8,000 g for 30 s followed by discarding of flow through. An additional 500 µl RPE was  
412 pipetted into column and centrifuged at 8,000 g for 2 min. Spin column was then placed in a  
413 new collection tube and centrifuged at 8,000 g for 2 min. Columns were transferred to a RNA  
414 low-bind Eppendorf tube and 30 µl of RNase free water added to directly to the filter. After  
415 an incubation of 1 min at RT, sample was centrifuged at 8,000 g for 1 min and flow through  
416 containing RNA stored at -80°C.

417 Purified RNA was quantified, and quality controlled using RNA 6000 Nano kit on a 2100  
418 Bioanalyser (Agilent). Only samples with RIN values above 8 were sequenced. RNA  
419 sequencing was performed at the Wellcome Trust Sanger Institute (Hinxton, UK) on paired-  
420 end 75 bp inserts on an Illumina HiSeq 2000 platform. Isolated RNA was processed by poly-  
421 A selection and/or Ribo-depletion. All samples were sequenced using non-stranded, paired-  
422 end protocol.

#### 423 **Sequence pre-processing and Differential Gene Expression (DGE) analysis**

424 Sequencing quality of raw FASTQ reads were assessed by FastQC software (v0.11.8).  
425 FASTQ reads were subsequently quality-filtered using fastp v0.20.0 with options -q 10  
426 (phred quality <10 was discarded) followed by merging reads into single read file for each  
427 sample (merge-paired-reads.sh) and rRNA sequence filtering via SortMeRNA v2.1 based on  
428 SILVA rRNA database optimised for SortMeRNA software [64, 65]. Filtered reads were then  
429 unmerged (unmerge-paired-reads.sh) and ready for DGE analysis.

430 Transcript mapping and quantification were performed using Kallisto v0.44.0 [66]. Briefly,  
431 *Mus musculus* (C57BL/6 mouse) cDNA sequences (GRCm38.release-98\_k31) were retrieved  
432 from Ensembl database and built into an index database with Kallisto utility index at default  
433 parameter that was used for following transcript mapping and abundance quantification via  
434 Kallisto utility quant at 100 bootstrap replicates (-b 100) [67].

435 Differential Gene Expression (DGE) analysis was performed using R library Sleuth (v0.30.0)  
436 [68]. Gene transcripts were mapped to individual genes using Ensembl BioMart database  
437 with Sleuth function *sleuth\_prep* with option *gene\_mode = TRUE*. Genes with an absolute  
438 log<sub>2</sub>(fold change) >1.0 and q value <0.05 (or, False Discovery Rate; FDR) were considered  
439 to be differentially expressed (or, significantly regulated) [69].

#### 440 **Functional annotation and enrichment analysis**

441 Functional assignment and enrichment analysis was performed using PANTHER  
442 Classification System [70]. Briefly, for functional assignment analysis, a list of genes of  
443 interest in Ensembl IDs were supplied to the webserver to be mapped to the Mouse Genome  
444 Database (MGD) to generate functional classification on those genes of interest [71]. For  
445 functional enrichment analysis, a gene list was supplied together with a background gene list  
446 in Ensembl IDs to Panther web server, then selected 'functional overrepresentation test' and  
447 chose a particular function class in the drop-down menu. Recommended by the database  
448 developers, Fisher's exact test and False Discovery Rate (FDR) correction were used to  
449 perform enrichment analysis [72]. FDR <0.05 was used as the default cut-off for significant  
450 enrichment. Graphs were plotted in R using ggplot2 library [61]. Functional annotation of top  
451 20 up/down-regulated genes was assigned manually via Ensembl and/or MGI (Mouse  
452 Genome Informatics) databases [71, 73].

#### 453 **Network, cluster and signalling pathway analysis**

454 A signalling network of all up-regulated DEGs and their first neighbours was built using all  
455 available biological signalling databases in the Cytoscape (v3.7.2) OmniPath app (v1, *Mus*  
456 *musculus*) [74, 75]. Modules of highly connected genes within the signalling network were  
457 identified using the MCODE plug-in within Cytoscape [76]. Settings below were applied to  
458 obtain clusters in the network: degree cutoff = 3, haircut = true, fluff = false, node score  
459 cutoff = 0.5, k-core = 3 and max depth = 100.

460 The nodes of each individual module were tested for functional enrichment based on both  
461 Reactome and PANTHER annotations using PANTHER Classification System as described  
462 in previous sub-section [70, 77, 78].

#### 463 **Enrichment of cell type specific marker genes**

464 Cell type signature gene sets for murine intestinal epithelial cells were obtained from Haber  
465 et al. [24]. Both droplet and plate-based results were used. Gene symbols were converted to  
466 Ensembl IDs using db2db [79]. Hypergeometric significance calculations were applied to test  
467 the presence of cell type specific signatures in the list of differentially expressed genes using  
468 all expressed genes as the statistical background (normalised counts > 1 in  $\geq 1$  sample).  
469 Bonferroni multiple correction was applied and any corrected  $p < 0.05$  was deemed  
470 significant. Genes with normalised counts > 1 in  $\geq 1$  sample per condition (*B. breve*

471 UCC2003 treated or control) were used to identify cell type signature genes expressed per  
472 condition.

### 473 **Key regulator analysis**

474 All mouse transcription factor - target gene interactions with quality scores A-D were  
475 obtained from DoRothEA v2 *via* the OmniPath Cytoscape app [26, 74, 75]. A subnetwork  
476 was generated consisting of differentially expressed stem cell signature genes and all their  
477 upstream TFs which were expressed in the transcriptomics dataset (normalised counts  $> 1$  in  
478  $\geq 1$  sample). These TFs were further filtered for their relevance in the network. Here all  
479 expressed genes and their upstream expressed TFs were extracted from the DoRothEA  
480 network. A hypergeometric significance test was carried out on any node with degree  $\geq 5$  to  
481 determine if the proportion of connected nodes which are differentially expressed is higher  
482 than in the whole network. Any TF with  $P$  value  $< 0.05$  following Benjamini-Hochberg  
483 correction were deemed significant and used to filter the stem cell signature gene subnetwork.  
484 Network visualisation was carried out in Cytoscape [75]. Functional enrichment carried out  
485 against Reactome pathways as described in previous sub-sections.

486

### 487 **Ethics Approval**

488 All experiments were performed under the UK Regulation of Animals (Scientific Procedures)  
489 Act of 1986. The project licence (PPL 80/2545) under which these studies were carried out  
490 was approved by the UK Home Office and the UEA Ethical Review Committee. Mice were  
491 sacrificed by CO<sub>2</sub> and cervical dislocation.

### 492 **Data and Code Availability**

493 All raw sequencing reads (both RNA-Seq and 16S rRNA amplicon sequencing) have been  
494 uploaded to European Nucleotide Archive (ENA) with accession number PRJEB36661. R  
495 scripts for Differential Gene Expression analysis are available on  
496 [https://github.com/raymondkiu/R\\_scripts/blob/master/sleuth.R](https://github.com/raymondkiu/R_scripts/blob/master/sleuth.R) while all other R scripts in  
497 data visualization will be available upon request.

### 498 **Supplemental Information**

499 Supplemental Information can be found online at



## 500 **Acknowledgements**

501 This research was supported in part by the Norwich Bioscience Institutes (NBI) Computing  
502 infrastructure for Science (CiS) group through the provision of a High-Performance  
503 Computing (HPC) Cluster. L. J. H. is funded by a Wellcome Trust Investigator award  
504 (100974/C/13/Z) and together with T. K. by a BBSRC ISP grant for Gut Microbes and Health  
505 BB/R012490/1 and its constituent project(s), BBS/E/F/000PR10353 and  
506 BBS/E/F/000PR10355. T. K. is also funded by the Genomics for Food security CSP grant  
507 from the BBSRC (BB/CSP17270/1). A. T. is supported by the BBSRC Norwich Research  
508 Park Biosciences Doctoral Training Partnership (grant BB/M011216/1). D. vS. is supported  
509 by Science Foundation Ireland (SFI/12/RC/2273-P1 and SFI/12/RC/2273-P2).

510

## 511 **Author Contributions**

512 Conceptualisation, R. K., L. C. H. and L. J. H.; Methodology, R. K., A. T., L. C. H. and L. J.  
513 H.; Software, R. K., A. T. and S. C.; Validation, R. K., A. T., T. K. and L. J. H.; Formal  
514 analysis, R. K. and A. T.; Investigation, R. K., A. T., L. C. H. and C. L.; Resources, S. C.;  
515 Data curation, R. K.; Writing -original draft preparation, R. K., A. T. and L. J. H.; Writing –  
516 review and editing, R. K., A. T., D. vS, T. K. and L. J. H.; Visualization, R. K. and A. T.;  
517 Supervision, T. K. and L. J. H.; Project administration, R. K.; Funding acquisition, T. K., D.  
518 vS. and L. J. H.

## 519 **Declaration of Interest**

520 The authors declare no competing interests.

521

## 522 **References**

- 523 1. Arrieta MC, Stiemsma LT, Amenyogbe N, Brown EM, Finlay B: **The intestinal**  
524 **microbiome in early life: health and disease.** *Frontiers in immunology* 2014, **5**:427.
- 525 2. O'Neill I, Schofield Z, Hall LJ: **Exploring the role of the microbiota member**  
526 **Bifidobacterium in modulating immune-linked diseases.** *Emerging Topics in Life*  
527 *Sciences* 2017, **1**(4):333-349.
- 528 3. Derrien M, Alvarez AS, de Vos WM: **The Gut Microbiota in the First Decade of**  
529 **Life.** *Trends in microbiology* 2019, **27**(12):997-1010.

- 530 4. Dominguez-Bello MG, Costello EK, Contreras M, Magris M, Hidalgo G, Fierer N,  
531 Knight R: **Delivery mode shapes the acquisition and structure of the initial**  
532 **microbiota across multiple body habitats in newborns.** *Proceedings of the*  
533 *National Academy of Sciences of the United States of America* 2010, **107**(26):11971-  
534 11975.
- 535 5. Mikami K, Kimura M, Takahashi H: **Influence of maternal bifidobacteria on the**  
536 **development of gut bifidobacteria in infants.** *Pharmaceuticals (Basel)* 2012,  
537 **5**(6):629-642.
- 538 6. Nagpal R, Kurakawa T, Tsuji H, Takahashi T, Kawashima K, Nagata S, Nomoto K,  
539 Yamashiro Y: **Evolution of gut Bifidobacterium population in healthy Japanese**  
540 **infants over the first three years of life: a quantitative assessment.** *Sci Rep* 2017,  
541 **7**(1):10097.
- 542 7. Stewart CJ, Ajami NJ, O'Brien JL, Hutchinson DS, Smith DP, Wong MC, Ross MC,  
543 Lloyd RE, Doddapaneni H, Metcalf GA *et al*: **Temporal development of the gut**  
544 **microbiome in early childhood from the TEDDY study.** *Nature* 2018,  
545 **562**(7728):583-588.
- 546 8. Fukuda S, Toh H, Taylor TD, Ohno H, Hattori M: **Acetate-producing bifidobacteria**  
547 **protect the host from enteropathogenic infection via carbohydrate transporters.**  
548 *Gut Microbes* 2012, **3**(5):449-454.
- 549 9. Ling X, Linglong P, Weixia D, Hong W: **Protective Effects of Bifidobacterium on**  
550 **Intestinal Barrier Function in LPS-Induced Enterocyte Barrier Injury of Caco-2**  
551 **Monolayers and in a Rat NEC Model.** *PloS one* 2016, **11**(8):e0161635.
- 552 10. Robertson C, Savva GM, Clapuci R, Jones J, Maimouni H, Brown E, Minocha A,  
553 Hall LJ, Clarke P: **Incidence of necrotising enterocolitis before and after**  
554 **introducing routine prophylactic Lactobacillus and Bifidobacterium probiotics.**  
555 *Arch Dis Child Fetal Neonatal Ed* 2019.
- 556 11. Lawson MAE, O'Neill IJ, Kujawska M, Gowrinadh Javvadi S, Wijeyesekera A, Flegg  
557 Z, Chalklen L, Hall LJ: **Breast milk-derived human milk oligosaccharides**  
558 **promote Bifidobacterium interactions within a single ecosystem.** *The ISME*  
559 *journal* 2020, **14**(2):635-648.
- 560 12. Thoo L, Noti M, Krebs P: **Keep calm: the intestinal barrier at the interface of**  
561 **peace and war.** *Cell Death Dis* 2019, **10**(11):849.
- 562 13. Groschwitz KR, Hogan SP: **Intestinal barrier function: molecular regulation and**  
563 **disease pathogenesis.** *J Allergy Clin Immunol* 2009, **124**(1):3-20; quiz 21-22.
- 564 14. Hsieh CY, Osaka T, Moriyama E, Date Y, Kikuchi J, Tsuneda S: **Strengthening of**  
565 **the intestinal epithelial tight junction by Bifidobacterium bifidum.** *Physiol Rep*  
566 2015, **3**(3).
- 567 15. Srutkova D, Schwarzer M, Hudcovic T, Zakostelska Z, Drab V, Spanova A, Rittich B,  
568 Kozakova H, Schabussova I: **Bifidobacterium longum CCM 7952 Promotes**  
569 **Epithelial Barrier Function and Prevents Acute DSS-Induced Colitis in Strictly**  
570 **Strain-Specific Manner.** *PloS one* 2015, **10**(7):e0134050.
- 571 16. Grimm V, Radulovic K, Riedel CU: **Colonization of C57BL/6 Mice by a Potential**  
572 **Probiotic Bifidobacterium bifidum Strain under Germ-Free and Specific**  
573 **Pathogen-Free Conditions and during Experimental Colitis.** *PloS one* 2015,  
574 **10**(10):e0139935.
- 575 17. Hughes KR, Harnisch LC, Alcon-Giner C, Mitra S, Wright CJ, Ketskemety J, van  
576 Sinderen D, Watson AJ, Hall LJ: **Bifidobacterium breve reduces apoptotic**  
577 **epithelial cell shedding in an exopolysaccharide and MyD88-dependent manner.**  
578 *Open Biol* 2017, **7**(1).

- 579 18. Zheng B, van Bergenhenegouwen J, Overbeek S, van de Kant HJ, Garssen J, Folkerts  
580 G, Vos P, Morgan ME, Kraneveld AD: **Bifidobacterium breve attenuates murine**  
581 **dextran sodium sulfate-induced colitis and increases regulatory T cell responses.**  
582 *PloS one* 2014, **9(5):e95441.**
- 583 19. Plantinga TS, van Maren WW, van Bergenhenegouwen J, Hameetman M, Nierkens S,  
584 Jacobs C, de Jong DJ, Joosten LA, van't Land B, Garssen J *et al*: **Differential Toll-**  
585 **like receptor recognition and induction of cytokine profile by Bifidobacterium**  
586 **breve and Lactobacillus strains of probiotics.** *Clin Vaccine Immunol* 2011,  
587 **18(4):621-628.**
- 588 20. Plaza-Diaz J, Gomez-Llorente C, Fontana L, Gil A: **Modulation of immunity and**  
589 **inflammatory gene expression in the gut, in inflammatory diseases of the gut and**  
590 **in the liver by probiotics.** *World journal of gastroenterology : WJG* 2014,  
591 **20(42):15632-15649.**
- 592 21. Riedel CU, Foata F, Philippe D, Adolfsson O, Eikmanns BJ, Blum S: **Anti-**  
593 **inflammatory effects of bifidobacteria by inhibition of LPS-induced NF-kappaB**  
594 **activation.** *World journal of gastroenterology : WJG* 2006, **12:3729-3735.**
- 595 22. Liu C, Zhang ZY, Dong K, Guo XK: **Adhesion and immunomodulatory effects of**  
596 **Bifidobacterium lactis HN019 on intestinal epithelial cells INT-407.** *World journal*  
597 *of gastroenterology : WJG* 2010, **16(18):2283-2290.**
- 598 23. Pan WH, Sommer F, Falk-Paulsen M, Ulas T, Best P, Fazio A, Kachroo P, Luzius A,  
599 Jentzsch M, Rehman A *et al*: **Exposure to the gut microbiota drives distinct**  
600 **methylome and transcriptome changes in intestinal epithelial cells during**  
601 **postnatal development.** *Genome Med* 2018, **10(1):27.**
- 602 24. Haber AL, Biton M, Rogel N, Herbst RH, Shekhar K, Smillie C, Burgin G, Delorey  
603 TM, Howitt MR, Katz Y *et al*: **A single-cell survey of the small intestinal**  
604 **epithelium.** *Nature* 2017, **551(7680):333-339.**
- 605 25. Nusse R: **Wnt signaling and stem cell control.** *Cell Res* 2008, **18(5):523-527.**
- 606 26. Garcia-Alonso L, Holland CH, Ibrahim MM, Turei D, Saez-Rodriguez J: **Benchmark**  
607 **and integration of resources for the estimation of human transcription factor**  
608 **activities.** *Genome Res* 2019, **29(8):1363-1375.**
- 609 27. Holland CH, Szalai B, Saez-Rodriguez J: **Transfer of regulatory knowledge from**  
610 **human to mouse for functional genomics analysis.** *Biochim Biophys Acta Gene*  
611 *Regul Mech* 2019:194431.
- 612 28. National Collection of Industrial Food and Marine Bacteria (NCIMB): **NCIMB 8807**  
613 **General Info.** In. Aberdeen; 2020.
- 614 29. Sheehan VM, Sleator RD, Hill C, Fitzgerald GF: **Improving gastric transit,**  
615 **gastrointestinal persistence and therapeutic efficacy of the probiotic strain**  
616 **Bifidobacterium breve UCC2003.** *Microbiology* 2007, **153(Pt 10):3563-3571.**
- 617 30. Cronin M, Sleator RD, Hill C, Fitzgerald GF, van Sinderen D: **Development of a**  
618 **luciferase-based reporter system to monitor Bifidobacterium breve UCC2003**  
619 **persistence in mice.** *BMC Microbiol* 2008, **8:161.**
- 620 31. O'Connell Motherway M, Zomer A, Leahy SC, Reunanen J, Bottacini F, Claesson  
621 MJ, O'Brien F, Flynn K, Casey PG, Munoz JA *et al*: **Functional genome analysis of**  
622 **Bifidobacterium breve UCC2003 reveals type IVb tight adherence (Tad) pili as**  
623 **an essential and conserved host-colonization factor.** *Proceedings of the National*  
624 *Academy of Sciences of the United States of America* 2011, **108(27):11217-11222.**
- 625 32. Turrone F, Taverniti V, Ruas-Madiedo P, Duranti S, Guglielmetti S, Lugli GA,  
626 Gioiosa L, Palanza P, Margolles A, van Sinderen D *et al*: **Bifidobacterium bifidum**  
627 **PRL2010 modulates the host innate immune response.** *Applied and environmental*  
628 *microbiology* 2014, **80(2):730-740.**

- 629 33. Gann RN: **Host Signaling Response to Adhesion of *Bifidobacterium infantis***. Utah  
630 State University; 2010.
- 631 34. Harburger DS, Calderwood DA: **Integrin signalling at a glance**. *J Cell Sci* 2009,  
632 **122**(Pt 2):159-163.
- 633 35. Qin J, Vinogradova O, Plow EF: **Integrin bidirectional signaling: a molecular  
634 view**. *PLoS Biol* 2004, **2**(6):e169.
- 635 36. Mosher DF, Fogerty FJ, Chernousov MA, Barry EL: **Assembly of fibronectin into  
636 extracellular matrix**. *Ann NY Acad Sci* 1991, **614**:167-180.
- 637 37. Chernyavsky AI, Arredondo J, Karlsson E, Wessler I, Grando SA: **The Ras/Raf-  
638 1/MEK1/ERK signaling pathway coupled to integrin expression mediates  
639 cholinergic regulation of keratinocyte directional migration**. *J Biol Chem* 2005,  
640 **280**(47):39220-39228.
- 641 38. Li L, Zhao GD, Shi Z, Qi LL, Zhou LY, Fu ZX: **The Ras/Raf/MEK/ERK signaling  
642 pathway and its role in the occurrence and development of HCC**. *Oncol Lett*  
643 2016, **12**(5):3045-3050.
- 644 39. Edelblum KL, Turner JR: **The tight junction in inflammatory disease:  
645 communication breakdown**. *Curr Opin Pharmacol* 2009, **9**(6):715-720.
- 646 40. Krug SM, Schulzke JD, Fromm M: **Tight junction, selective permeability, and  
647 related diseases**. *Semin Cell Dev Biol* 2014, **36**:166-176.
- 648 41. Kronman MP, Zaoutis TE, Haynes K, Feng R, Coffin SE: **Antibiotic exposure and  
649 IBD development among children: a population-based cohort study**. *Pediatrics*  
650 2012, **130**(4):e794-803.
- 651 42. Hildebrand H, Malmborg P, Askling J, Ekblom A, Montgomery SM: **Early-life  
652 exposures associated with antibiotic use and risk of subsequent Crohn's disease**.  
653 *Scand J Gastroenterol* 2008, **43**(8):961-966.
- 654 43. Favier C, Neut C, Mizon C, Cortot A, Colombel JF, Mizon J: **Fecal beta-D-  
655 galactosidase production and Bifidobacteria are decreased in Crohn's disease**.  
656 *Dig Dis Sci* 1997, **42**(4):817-822.
- 657 44. Shaw SY, Blanchard JF, Bernstein CN: **Association between the use of antibiotics  
658 in the first year of life and pediatric inflammatory bowel disease**. *Am J  
659 Gastroenterol* 2010, **105**(12):2687-2692.
- 660 45. Ng SC, Benjamin JL, McCarthy NE, Hedin CR, Koutsoumpas A, Plamondon S, Price  
661 CL, Hart AL, Kamm MA, Forbes A *et al*: **Relationship between human intestinal  
662 dendritic cells, gut microbiota, and disease activity in Crohn's disease**. *Inflamm  
663 Bowel Dis* 2011, **17**(10):2027-2037.
- 664 46. Din A, U., Hassan A, Zhu Y: **Inhibitory effect of Bifidobacterium Bifidum  
665 ATCC29521 on colitis and its mechanism**. *The Journal of Nutritional Biochemistry*  
666 2020.
- 667 47. Shirazi T, Longman RJ, Corfield AP, Probert CS: **Mucins and inflammatory bowel  
668 disease**. *Postgrad Med J* 2000, **76**(898):473-478.
- 669 48. Van der Sluis M, De Koning BA, De Bruijn AC, Velcich A, Meijerink JP, Van  
670 Goudoever JB, Buller HA, Dekker J, Van Seuningen I, Renes IB *et al*: **Muc2-  
671 deficient mice spontaneously develop colitis, indicating that MUC2 is critical for  
672 colonic protection**. *Gastroenterology* 2006, **131**(1):117-129.
- 673 49. O'Connell Motherway M, Houston A, O'Callaghan G, Reunanen J, O'Brien F,  
674 O'Driscoll T, Casey PG, de Vos WM, van Sinderen D, Shanahan F: **A  
675 Bifidobacterial pilus-associated protein promotes colonic epithelial proliferation**.  
676 *Mol Microbiol* 2019, **111**(1):287-301.
- 677 50. Ewaschuk JB, Diaz H, Meddings L, Diederichs B, Dmytrash A, Backer J, Looijer-van  
678 Langen M, Madsen KL: **Secreted bioactive factors from Bifidobacterium infantis**

- 679 **enhance epithelial cell barrier function. *Am J Physiol Gastrointest Liver Physiol*  
680 2008, **295**:G1025-G1034.**
- 681 51. Lewis MC, Merrifield CA, Berger B, Cloarec O, Duncker S, Mercenier A, Nicholson  
682 JK, Holmes E, Bailey M: **Early intervention with *Bifidobacterium lactis* NCC2818**  
683 **modulates the host-microbe interface independent of the sustained changes**  
684 **induced by the neonatal environment. *Sci Rep* 2017, **7**(1):5310.**
- 685 52. Tomosada Y, Villena J, Murata K, Chiba E, Shimazu T, Aso H, Iwabuchi N, Xiao JZ,  
686 Saito T, Kitazawa H: **Immunoregulatory effect of bifidobacteria strains in porcine**  
687 **intestinal epithelial cells through modulation of ubiquitin-editing enzyme A20**  
688 **expression. *PloS one* 2013, **8**(3):e59259.**
- 689 53. Guo S, Guo Y, Ergun A, Lu L, Walker WA, Ganguli K: **Secreted Metabolites of**  
690 ***Bifidobacterium infantis* and *Lactobacillus acidophilus* Protect Immature**  
691 **Human Enterocytes from IL-1beta-Induced Inflammation: A Transcription**  
692 **Profiling Analysis. *PloS one* 2015, **10**(4):e0124549.**
- 693 54. Jeong Y, Mangelsdorf DJ: **Nuclear receptor regulation of stemness and stem cell**  
694 **differentiation. *Exp Mol Med* 2009, **41**(8):525-537.**
- 695 55. Imperato MR, Cauchy P, Obier N, Bonifer C: **The RUNX1-PU.1 axis in the control**  
696 **of hematopoiesis. *Int J Hematol* 2015, **101**(4):319-329.**
- 697 56. Alcon-Giner C, Dalby MJ, Caim S, Ketskemety J, Shaw A, Sim K, Lawson M, Kiu R,  
698 Leclaire C, Chalklen L *et al*: **Microbiota supplementation with *Bifidobacterium***  
699 **and *Lactobacillus* modifies the preterm infant gut microbiota and metabolome.**  
700 *bioRxiv* 2019:698092.
- 701 57. Kiu R, Brown J, Bedwell H, Leclaire C, Caim S, Pickard D, Dougan G, Dixon RA,  
702 Hall LJ: **Genomic analysis on broiler-associated *Clostridium perfringens* strains**  
703 **and exploratory caecal microbiome investigation reveals key factors linked to**  
704 **poultry necrotic enteritis. *Animal Microbiome* 2019, **1**(1):12.**
- 705 58. Caporaso JG, Kuczynski J, Stombaugh J, Bittinger K, Bushman FD, Costello EK,  
706 Fierer N, Pena AG, Goodrich JK, Gordon JI *et al*: **QIIME allows analysis of high-**  
707 **throughput community sequencing data. *Nat Methods* 2010, **7**(5):335-336.**
- 708 59. Dixon P: **VEGAN, a package of R functions for community ecology. *J Veg Sci*  
709 2003, **14**(6):927-930.**
- 710 60. Tang Y, Horikoshi M, Li WX: **ggfortify: Unified Interface to Visualize Statistical**  
711 **Result of Popular R Packages. *The R Journal* 2016, **8**(2).**
- 712 61. R Development Core Team: **R: A language and environment for statistical**  
713 **computing.** In: *R Foundation for Statistical Computing.* Vienna, Austria; 2010.
- 714 62. Segata N, Izard J, Waldron L, Gevers D, Miropolsky L, Garrett WS, Huttenhower C:  
715 **Metagenomic biomarker discovery and explanation. *Genome Biol* 2011,  
716 **12**(6):R60.**
- 717 63. Wickham H: **ggplot2: Elegant Graphics for Data Analysis.** New York: Springer-  
718 Verlag; 2016.
- 719 64. Chen S, Zhou Y, Chen Y, Gu J: **fastp: an ultra-fast all-in-one FASTQ**  
720 **preprocessor. *Bioinformatics* 2018, **34**(17):i884-i890.**
- 721 65. Kopylova E, Noe L, Touzet H: **SortMeRNA: fast and accurate filtering of**  
722 **ribosomal RNAs in metatranscriptomic data. *Bioinformatics* 2012, **28**(24):3211-  
723 3217.**
- 724 66. Bray NL, Pimentel H, Melsted P, Pachter L: **Near-optimal probabilistic RNA-seq**  
725 **quantification. *Nat Biotechnol* 2016, **34**(5):525-527.**
- 726 67. Zerbino DR, Achuthan P, Akanni W, Amode MR, Barrell D, Bhai J, Billis K,  
727 Cummins C, Gall A, Giron CG *et al*: **Ensembl 2018. *Nucleic Acids Res* 2018,  
728 **46**(D1):D754-D761.**

- 729 68. Pimentel H, Bray NL, Puente S, Melsted P, Pachter L: **Differential analysis of RNA-**  
730 **seq incorporating quantification uncertainty.** *Nat Methods* 2017, **14**(7):687-690.
- 731 69. Kinsella RJ, Kahari A, Haider S, Zamora J, Proctor G, Spudich G, Almeida-King J,  
732 Staines D, Derwent P, Kerhornou A *et al*: **Ensembl BioMart: a hub for data**  
733 **retrieval across taxonomic space.** *Database (Oxford)* 2011, **2011**:bar030.
- 734 70. Mi H, Muruganujan A, Ebert D, Huang X, Thomas PD: **PANTHER version 14:**  
735 **more genomes, a new PANTHER GO-slim and improvements in enrichment**  
736 **analysis tools.** *Nucleic Acids Res* 2019, **47**(D1):D419-D426.
- 737 71. Bult CJ, Blake JA, Smith CL, Kadin JA, Richardson JE, Mouse Genome Database G:  
738 **Mouse Genome Database (MGD) 2019.** *Nucleic Acids Res* 2019, **47**(D1):D801-  
739 D806.
- 740 72. Mi H, Muruganujan A, Huang X, Ebert D, Mills C, Guo X, Thomas PD: **Protocol**  
741 **Update for large-scale genome and gene function analysis with the PANTHER**  
742 **classification system (v.14.0).** *Nat Protoc* 2019, **14**(3):703-721.
- 743 73. Cunningham F, Achuthan P, Akanni W, Allen J, Amode MR, Armean IM, Bennett R,  
744 Bhai J, Billis K, Boddu S *et al*: **Ensembl 2019.** *Nucleic Acids Res* 2019,  
745 **47**(D1):D745-D751.
- 746 74. Turei D, Korcsmaros T, Saez-Rodriguez J: **OmniPath: guidelines and gateway for**  
747 **literature-curated signaling pathway resources.** *Nat Methods* 2016, **13**(12):966-  
748 967.
- 749 75. Shannon P, Markiel A, Ozier O, Baliga NS, Wang JT, Ramage D, Amin N,  
750 Schwikowski B, Ideker T: **Cytoscape: a software environment for integrated**  
751 **models of biomolecular interaction networks.** *Genome Res* 2003, **13**(11):2498-  
752 2504.
- 753 76. Bader GD, Hogue CW: **An automated method for finding molecular complexes in**  
754 **large protein interaction networks.** *BMC Bioinformatics* 2003, **4**:2.
- 755 77. Mi H, Thomas P: **PANTHER pathway: an ontology-based pathway database**  
756 **coupled with data analysis tools.** *Methods Mol Biol* 2009, **563**:123-140.
- 757 78. Croft D, O'Kelly G, Wu G, Haw R, Gillespie M, Matthews L, Caudy M, Garapati P,  
758 Gopinath G, Jassal B *et al*: **Reactome: a database of reactions, pathways and**  
759 **biological processes.** *Nucleic Acids Res* 2011, **39**(Database issue):D691-697.
- 760 79. Mudunuri U, Che A, Yi M, Stephens RM: **bioDBnet: the biological database**  
761 **network.** *Bioinformatics* 2009, **25**(4):555-556.

762

## 763 **Figure and Scheme Legends**

764 **Fig. 1.** Schematic representation of study design, experimental validation and *in silico*  
765 analysis workflow.

766 **Fig. 2.** 16S rRNA amplicon sequencing analysis of murine intestinal microbiota. (a) 16S  
767 rRNA gene profiling of mice gut microbiota at genus level on Day 4. (b) Dynamics of *B.*  
768 *breve* UCC2003 load (CFU/g) from Day 1 (prior to *B. breve* administration) through Day 4.  
769 *B. breve* was present in intestines throughout (small intestines and colon; on Day 4). (c)  
770 Relative abundance of genus *Bifidobacterium* in UCC2003 group is significantly increased.  
771 (d) Principal Component Analysis on mice gut microbiota. (e) Shannon diversity index on

772 mice gut microbiota. Data are represented as mean  $\pm$  SD. Significance test: *t*-test (\* $P < 0.05$ ;  
773 two-sided). (f) Linear Discriminant Analysis (LDA) showing enriched taxa in each group. (g)  
774 Relative abundance comparison in all genus. \*  $P < 0.05$  in LDA.

775 **Fig. 3.** RNA-Seq analysis and statistics (a) Principal component analysis showing distinct  
776 overall gene expression profiles across all individual samples based on 12,965 highly-  
777 expressed genes; (b) Clustering of individual RNA-seq samples based on Jensen-Shannon  
778 distance; (c) Total number of differentially expressed genes (DEG) when comparing two  
779 conditions (UCC2003 vs Control), DEG with  $\text{Log}_2\text{FC} > 1.0$  (up-regulation) or  $\text{Log}_2\text{FC} < -1.0$   
780 (down-regulation) are considered as significantly regulated genes; (d) Volcano plot and (e)  
781 MA plot on global gene expression (UCC2003 vs Control). Genes that passed the  
782 significance filter (FDR  $< 0.05$ ) are labelled as red dots.

783 **Fig. 4.** Gene expression analysis (a) Clustered normalised gene expression profiles on 4,461  
784 significantly regulated genes (up- and down-regulated; FDR  $< 0.05$ ) in mice induced by *B.*  
785 *breve* UCC2003; (b) Top 20 significantly regulated genes ranked by FDR (q-value); (c) Top  
786 20 significantly up-regulated genes ranked by  $\text{log}_2\text{FC}$  values; (d) Top 20 significantly down-  
787 regulated genes ranked by  $\text{log}_2\text{FC}$  values. Gene expression of (e) Epithelial integrity-  
788 associated DEG (FDR  $< 0.05$ ), and (f) Integrin-associated DEG in UCC2003 group were  
789 shown in the bar charts with dotted line indicating the threshold of significance (absolute  
790  $\text{Log}_2\text{FC} > 1.0$ ). Data are represented as Mean  $\pm$  SE.

791 **Fig. 5.** Signalling network analysis, IEC subtyping and key regulator analysis (a) Cluster  
792 analysis of signalling network for significantly up-regulated genes ( $n=3,996$ ). Representative  
793 enriched pathways (Reactome) and GO terms (Biological Process) identified in each  
794 individual cluster were listed alongside. (b) Heat plot showing percentage of cell type  
795 signature genes in DEG and expressed genes (both control and UCC2003 groups). All  
796 expressed genes are well represented in IEC cell type signature genes. (c) Cell type analysis  
797 on IEC DEGs using known cell-specific signature genes. Stem cells were statistically over-  
798 represented in DEGs. \*  $P < 0.05$ . (d) Key regulators of stem cell DEGs.

799

800

801

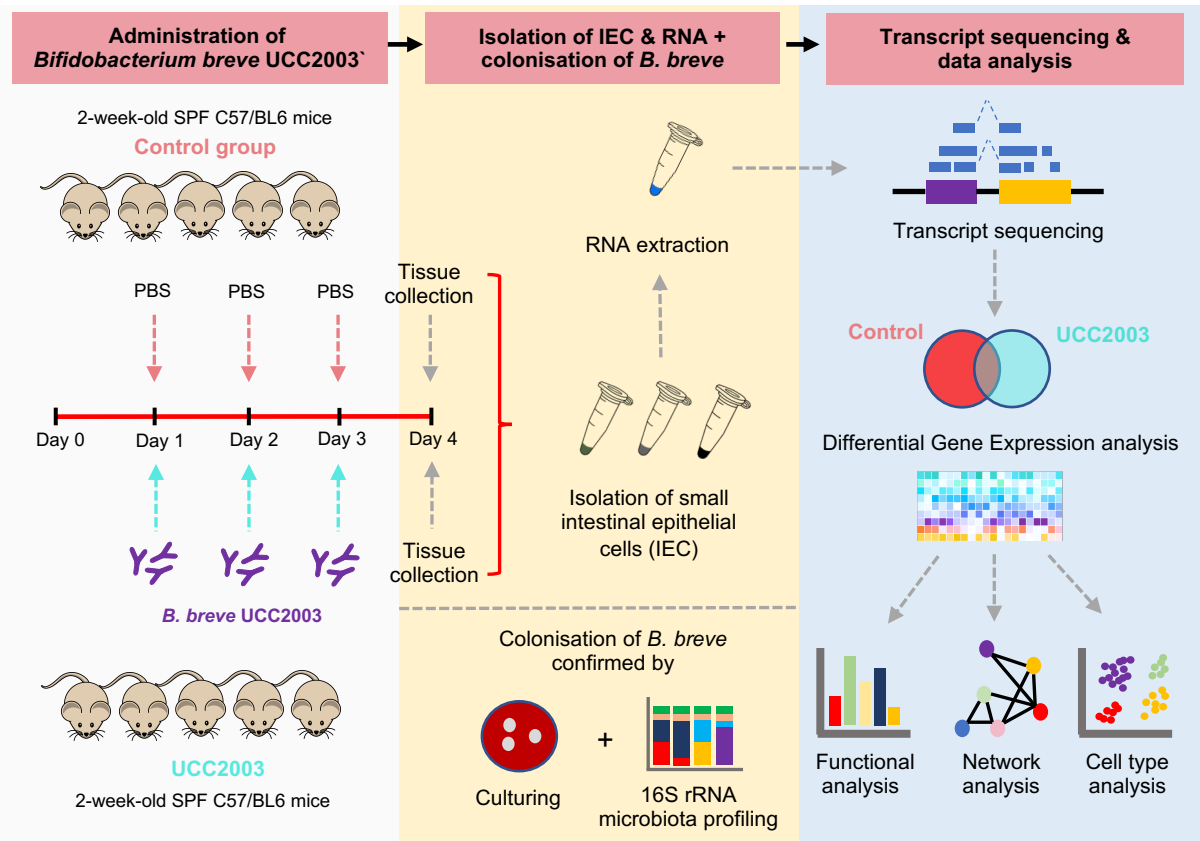

**Fig. 1.** Schematic representation of the study design, experimental validation and *in silico* analysis workflow.



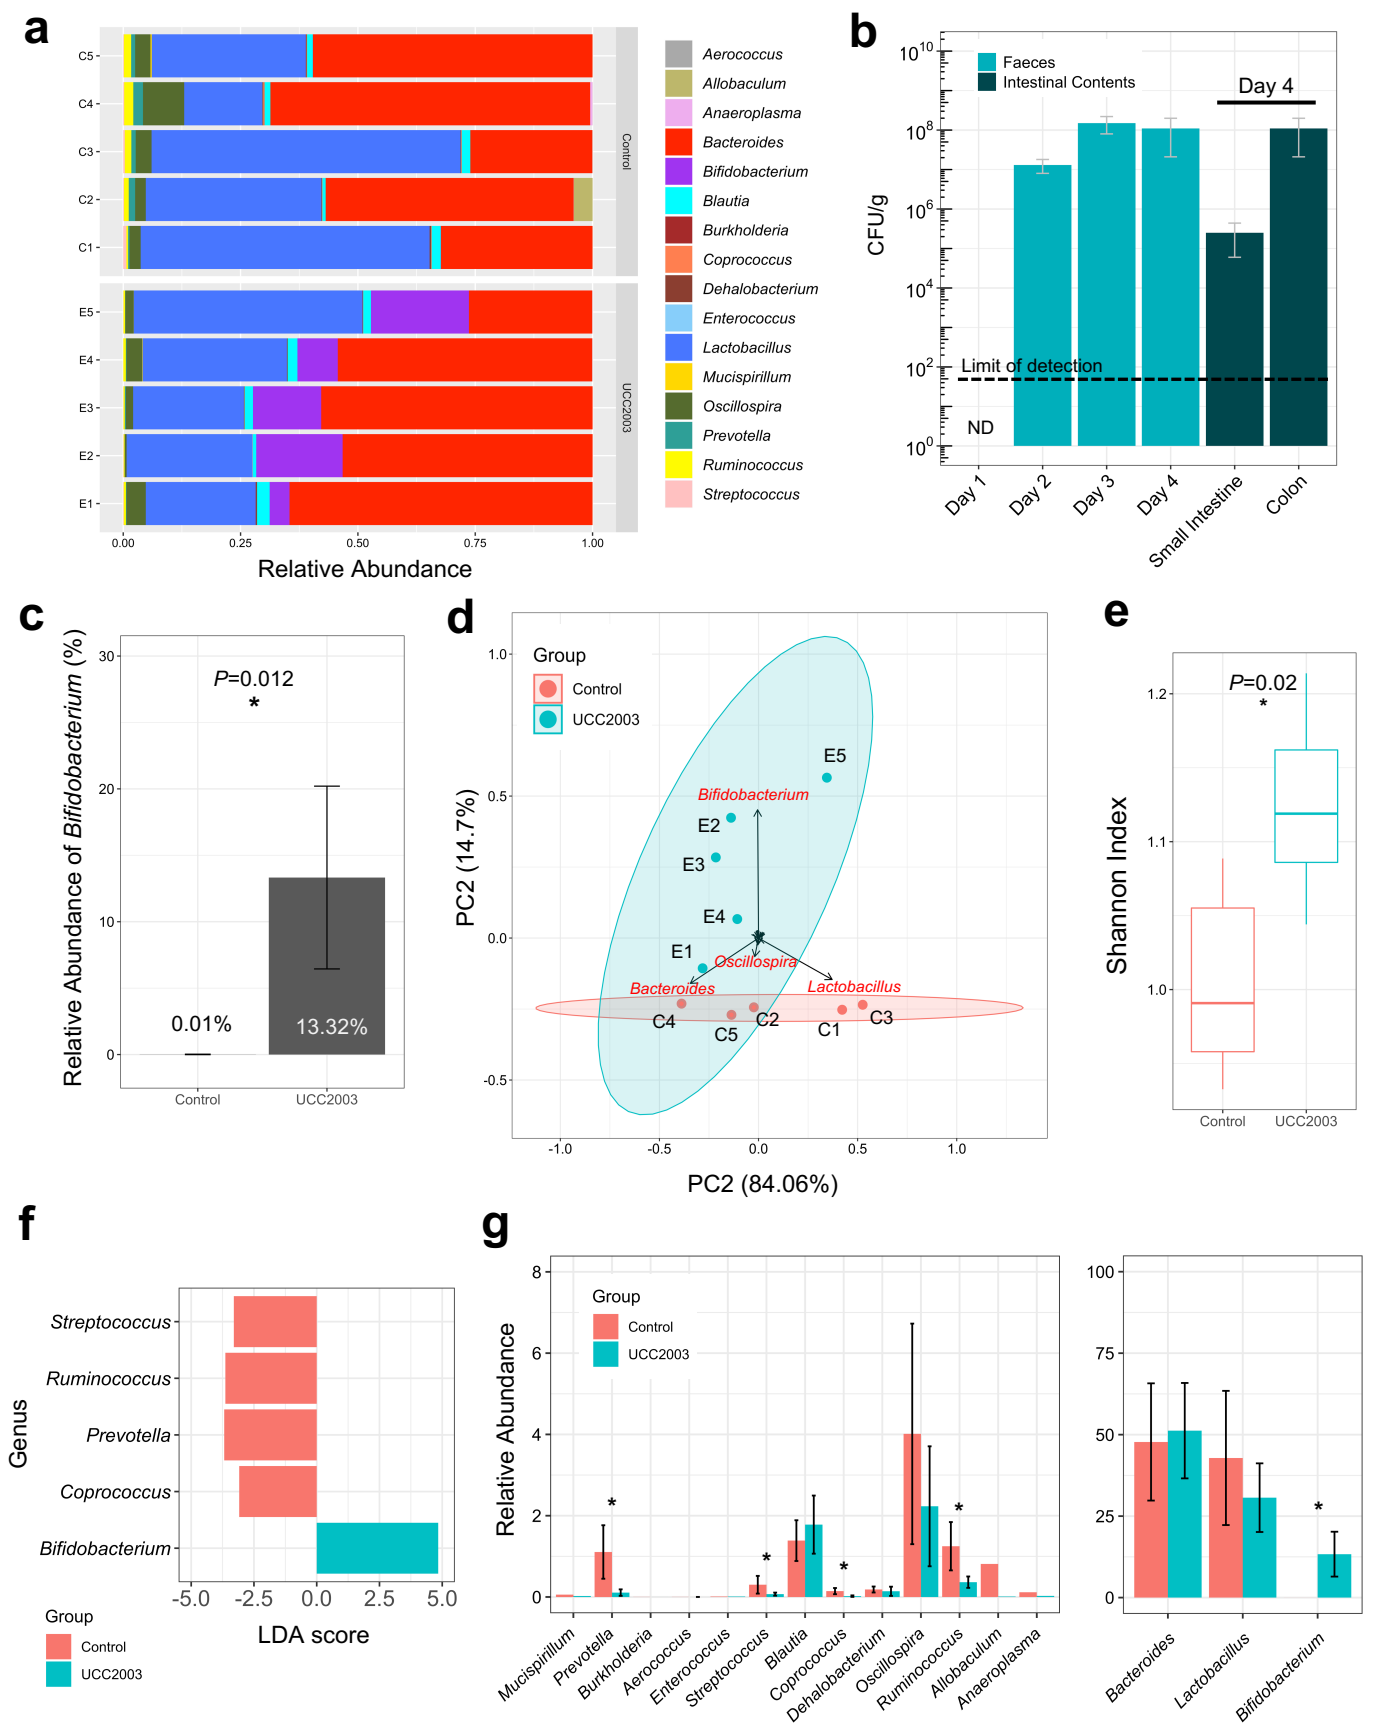

**Fig. 2. 16S rRNA amplicon sequencing analysis of rodent intestinal microbiota.** (a) 16S rRNA gene profiling of mice gut microbiota at genus level on Day 4. (b) Dynamics of *B. breve* UCC2003 load (CFU/g) from Day 1 (prior to *B. breve* administration) through Day 4. *B. breve* was present in intestines throughout (small intestines and colon; on Day 4). ND: Non-detectable. Data are represented as mean  $\pm$  SD. (c) Relative abundance of genus *Bifidobacterium* in UCC2003 group is significantly increased. (d) Principal Component Analysis on mice gut microbiota. (e) Shannon diversity index on mice gut microbiota. Data are represented as mean  $\pm$  SD. Significance test: *t*-test (\* $P < 0.05$ ; two-sided). (f) Linear Discriminant Analysis (LDA) showing enriched taxa in each group. (g) Relative abundance comparison in all genera. \*  $P < 0.05$  in LDA.

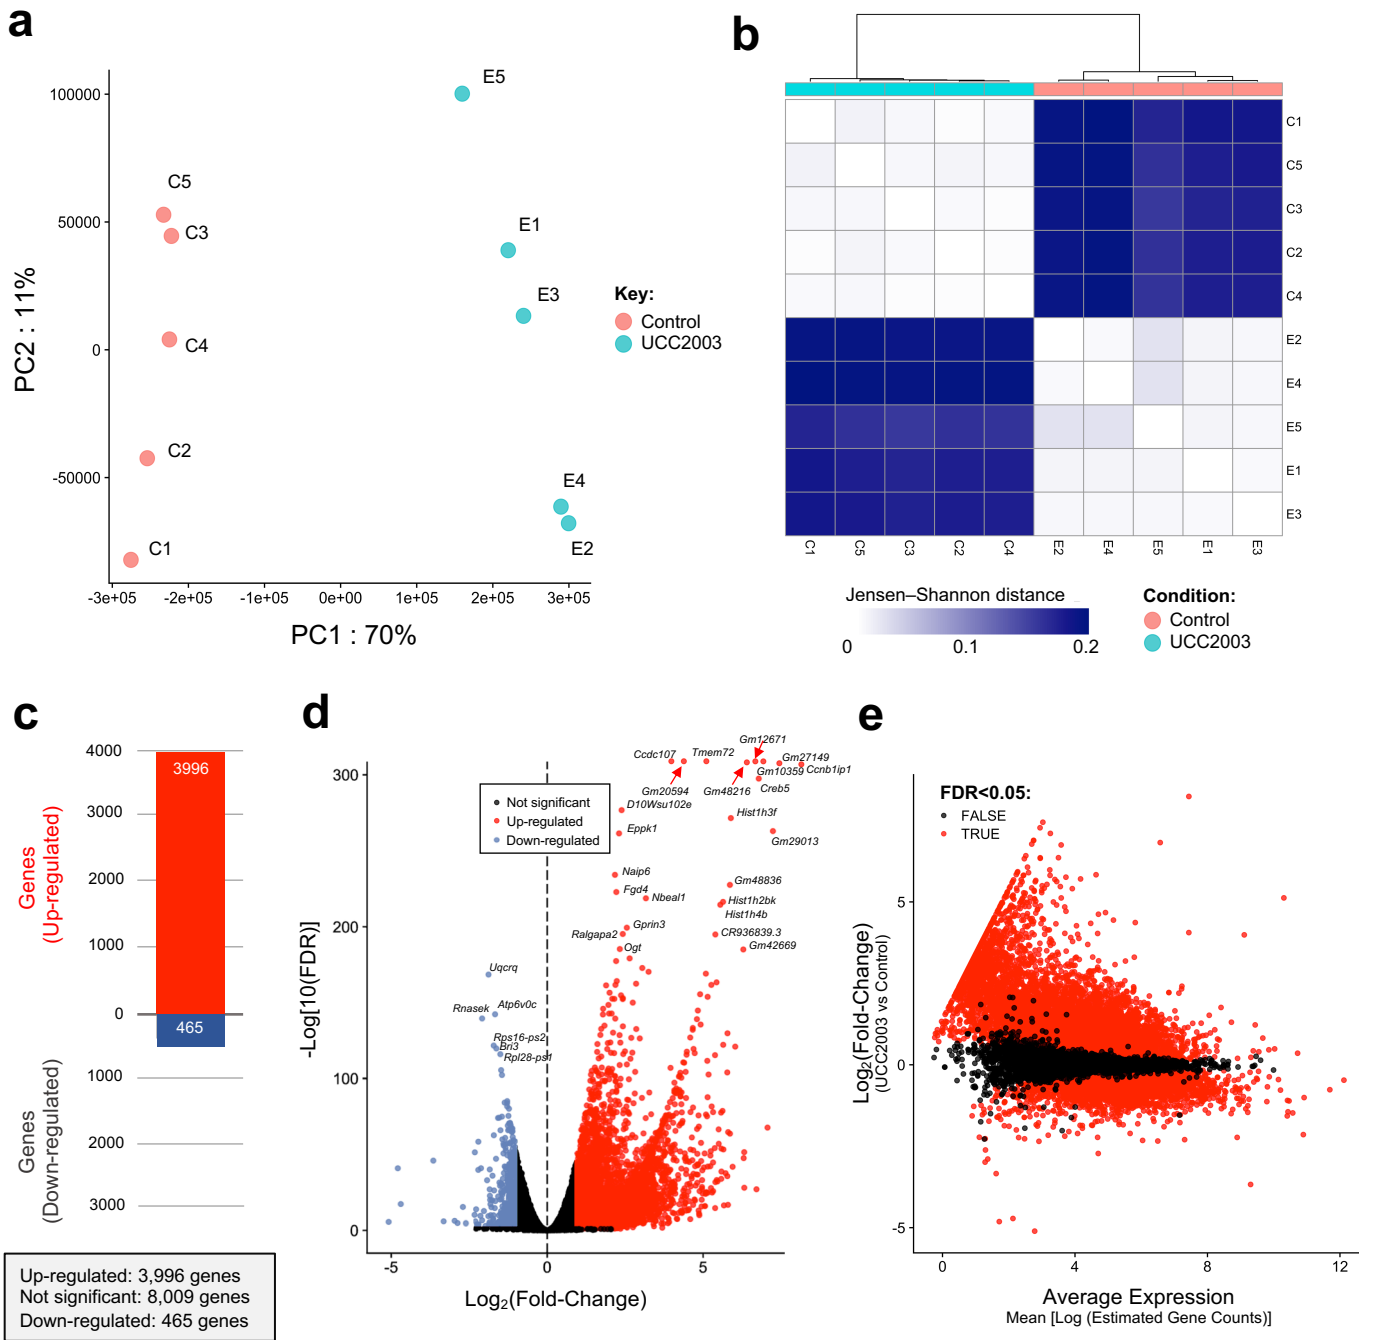

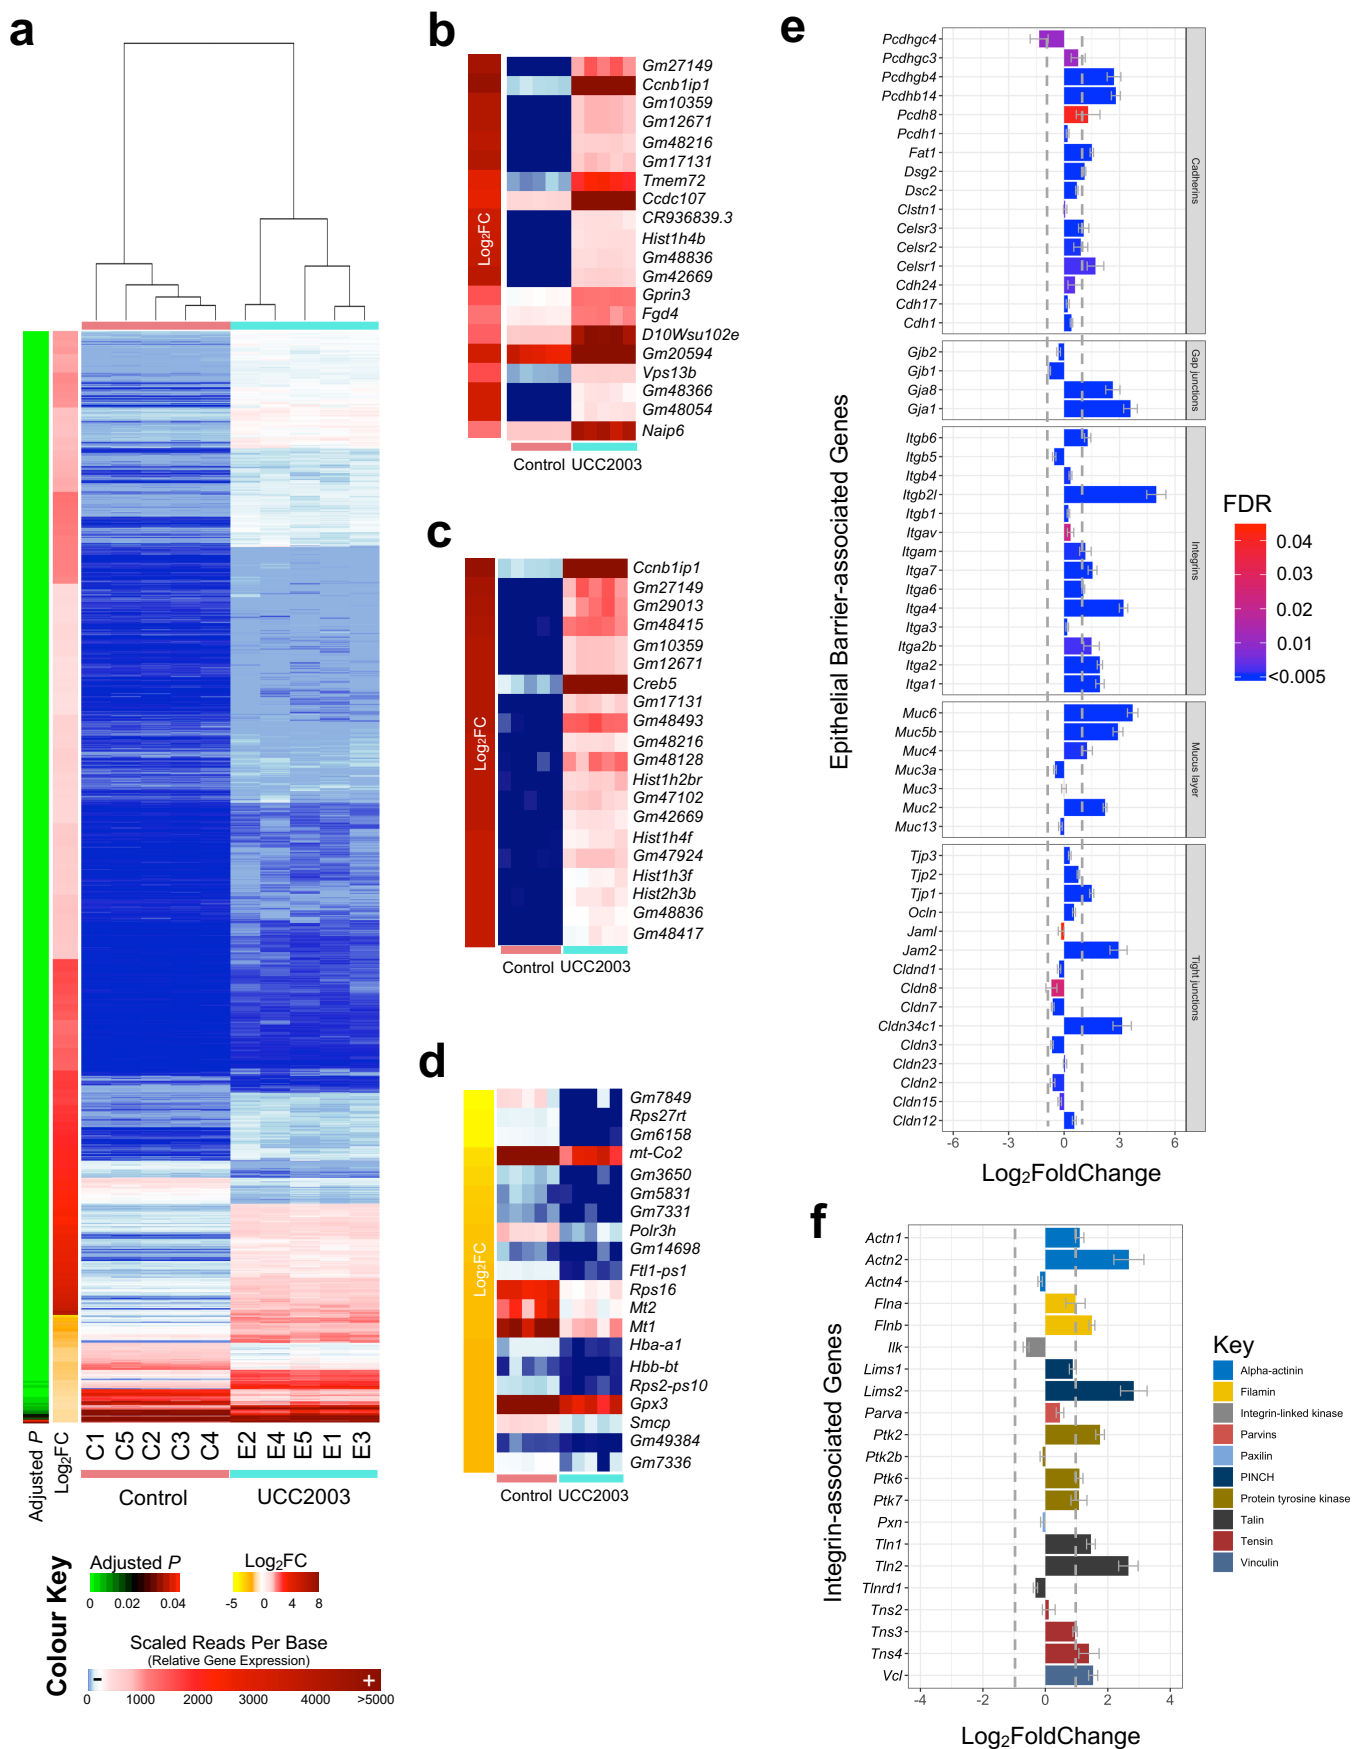

**Fig. 4.** Gene expression analysis (a) Clustered normalised gene expression profiles on 4,461 significantly regulated genes (up- and down-regulated;  $FDR < 0.05$ ) in mice induced by *B. breve* UCC2003; (b) Top 20 significantly regulated genes ranked by FDR (q-value); (c) Top 20 significantly up-regulated genes ranked by  $\log_2FC$  values; (d) Top 20 significantly down-regulated genes ranked by  $\log_2FC$  values. Gene expression of (e) Epithelial integrity-associated DEG ( $FDR < 0.05$ ), and (f) Integrin-associated DEG in UCC2003 group were shown in the bar charts with dotted line indicating the threshold of significance (absolute  $\log_2FC > 1.0$ ). Data are represented as Mean  $\pm$  SE.

**a**

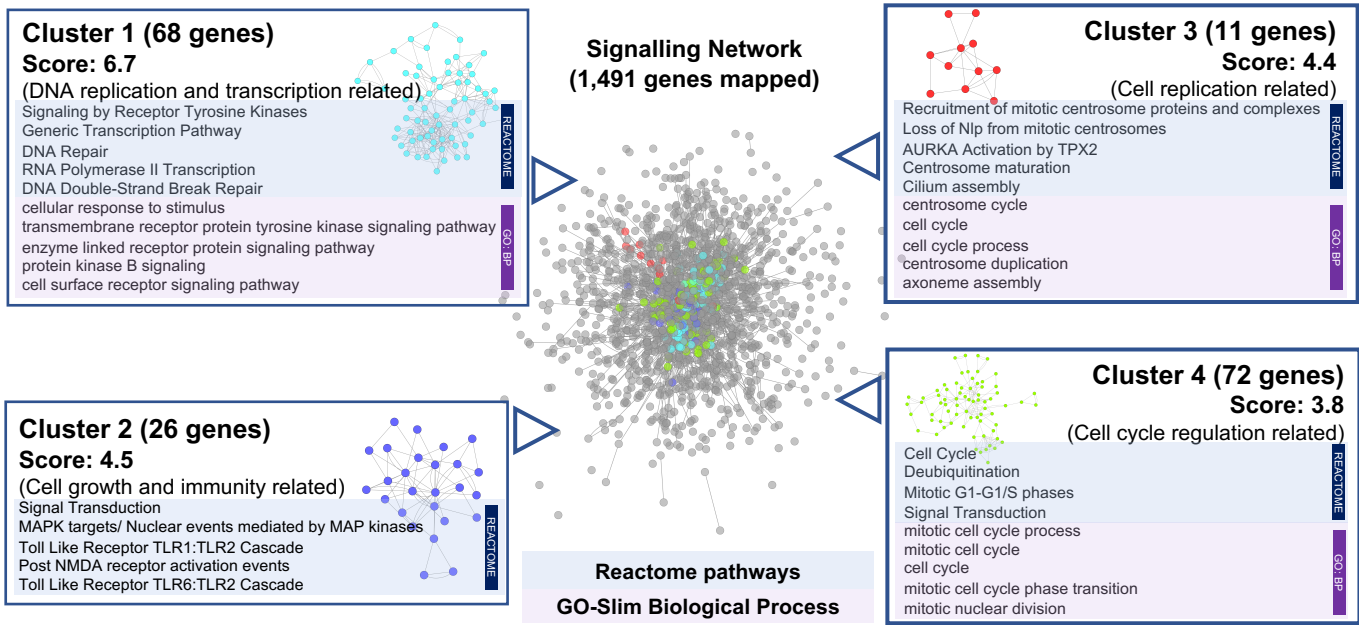

**b**

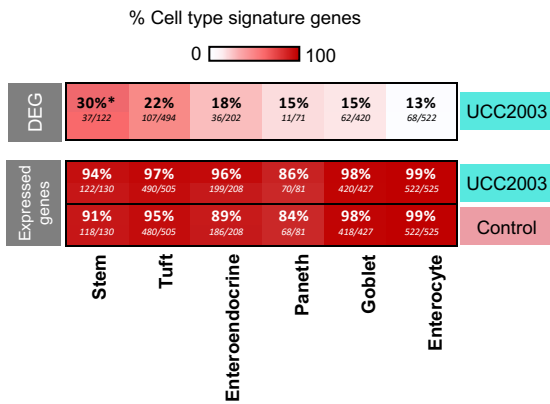

**c**

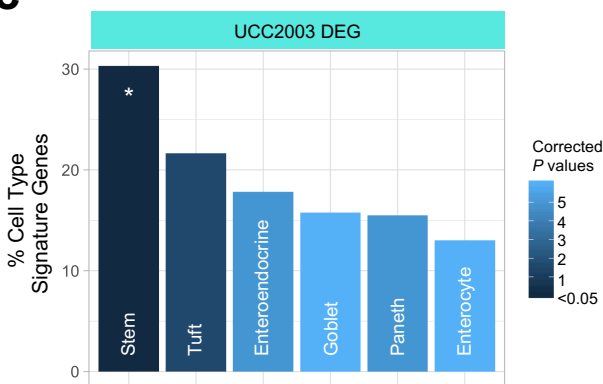

**d**

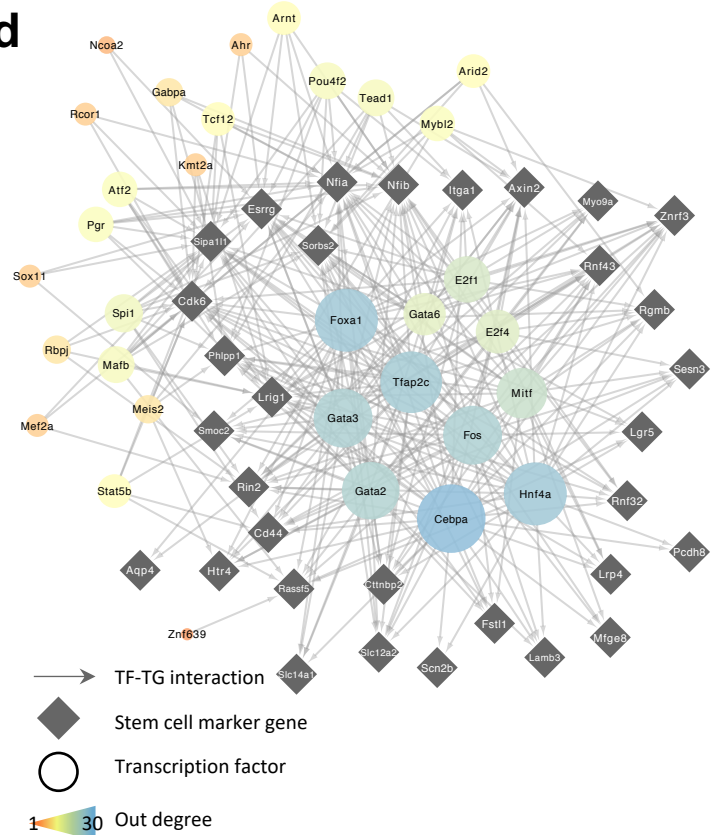

**Fig. 5.** Signalling network analysis, IEC subtyping and key regulator analysis (a) Cluster analysis of signaling network for significantly up-regulated genes ( $n=3,996$ ). Representative enriched pathways (Reactome) and GO terms (Biological Process) identified in each individual cluster were listed alongside. (b) Heat plot showing percentage of cell type signature genes in DEG and expressed genes (both control and UCC2003 groups). All expressed genes are well represented in IEC cell type signature genes. (c) Cell type analysis on IEC DEGs using known cell-specific signature genes. Stem cells were statistically over-represented in DEGs. \*  $P<0.05$ . (d) Key regulators of stem cell DEGs.

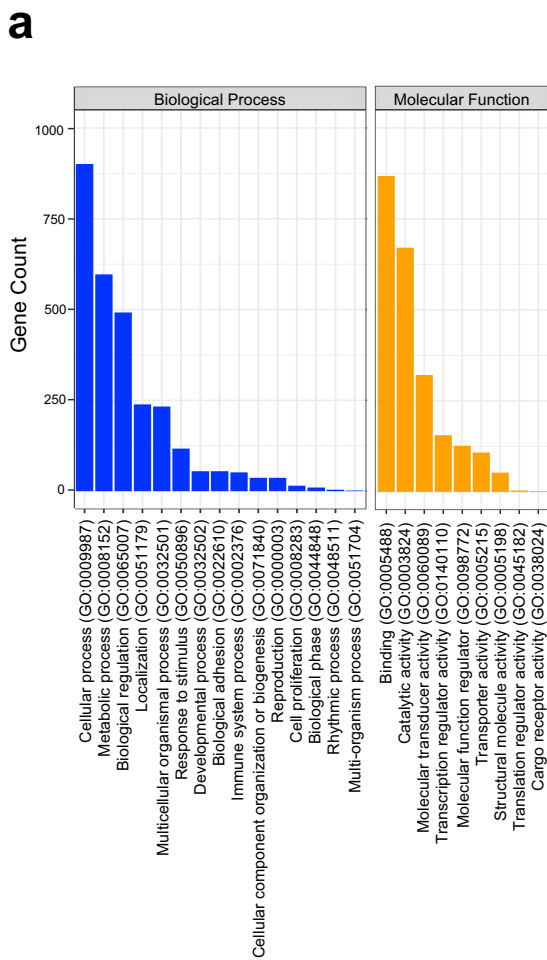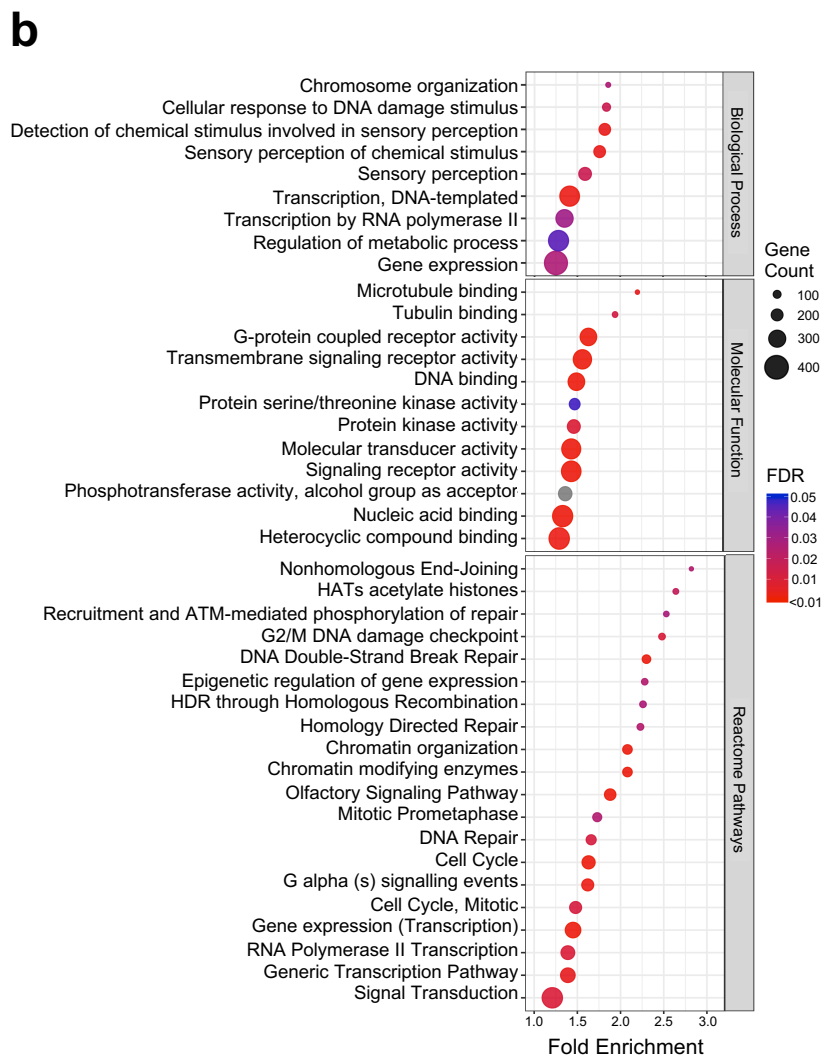

**Fig. S1.** Functional analysis on differentially expressed genes (a) Panther Slim GO-term major categories of significantly up-regulated genes ( $n=3,996$ ). (b) Functional and pathway enrichment analysis on significantly up-regulated genes (Panther Slim GO-term). Only top 20 FDR-ranked enriched pathways (Reactome pathways) are shown. Statistical significance cut-offs:  $FDR < 0.05$ . Statistical significance: Fisher's Exact Test. Fold Enrichment was calculated against all expressed genes in IECs as the background ( $n=21,537$ ).
